# **Estradiol Action at the Median Preoptic Nucleus is Necessary and Sufficient for Sleep Suppression in Female rats**

Smith PC, Cusmano DM, Phillips DJ, Viechweg SS, Schwartz MD, Mong JA

Support: This work was supported by Grant 1F30HL145901 (to P.C.S.), Grant F31AG043329 (to D.M.C.) and Grant R01HL85037 (to J.A.M.). The authors are responsible for this work; it does not necessarily represent the official views of the NIA, NHLBI, or NIH.

Disclosure: The authors have nothing to disclose

Conflicts of Interest: The authors have no conflicts of interest.

## **Abstract**

To further our understanding of how gonadal steroids impact sleep biology, we sought to address the mechanism by which proestrus levels of cycling ovarian steroids, particularly estradiol (E2), suppress sleep in female rats. We showed that steroid replacement of proestrus levels of E2 to ovariectomized female rats, suppressed sleep to similar levels as those reported by endogenous ovarian hormones. We further showed that this suppression is due to the high levels of E2 alone, and that progesterone did not have a significant impact on sleep behavior. We found that E2 action within the Median Preoptic Nucleus (MnPN), which contains estrogen receptors (ERs), is necessary for this effect; antagonism of ERs in the MnPN attenuated the E2-mediated suppression of both non-Rapid Eye Movement (NREM) and Rapid Eye Movement (REM) sleep. Finally, we found E2 action at the MnPN is also sufficient for sleep suppression, as direct infusion of E2 into the MnPN suppressed sleep. Based on our findings, we predict proestrus levels of E2 alone, acting at the MnPN, mediate sex-hormone driven suppression of sleep in female rats.

## A. Introduction

We have reported in adult female rats that sleep-wake behavior and neuronal activation in preoptic area sleep nuclei are highly sensitive to fluctuations in circulating E2. Sleep behavior in males, is completely insensitive to changes in gonadal steroids, both E2 and testosterone, due to developmental programming effects of gonadal steroids on the preoptic area sleep active nuclei.<sup>6,196</sup> Thus, the preoptic area suggests itself as a potential site of E2 action on sleep. The ventrolateral preoptic area (VLPO) and the median preoptic nucleus (MnPN) are two key sleep-active nuclei involved in the onset and maintenance of sleep.<sup>159-160</sup> Moreover, previous findings suggest sleep-active neurons in the VLPO are sensitive to fluctuations in ovarian steroids.<sup>7</sup> E2 replacement following ovariectomy reduces neuronal activation of VLPO sleep active neurons as well as mRNA expression and protein levels of lipocalin-type prostaglandin D synthase (L-PGDS), the synthesizing enzyme for the somnogen prostaglandin D2.<sup>7,197</sup> Together, these data suggest that E2 action in the preoptic area nuclei may alter critical factors involved in sleep and sleep homeostasis.

In the current study, we sought to expand our knowledge of the mechanisms through which ovarian steroids regulate sleep-wake behavior in adult female rats and specifically determine if the preoptic area is the locus of these effects. Using an exogenous hormone replacement model that mimics the estrous cycle levels and timing of E2 and progesterone, we first tested whether E2 alone is sufficient to induce changes in sleep-wake behavior and sleep homeostasis or if progesterone has additional actions. Second, using pharmacological manipulations of local estrogenic signaling in the preoptic area sleep nuclei, with ER antagonism and local E2 infusion, we investigated whether E2 is necessary and sufficient to induce changes in sleep-wake behavior and homeostasis. These

experiments test the hypothesis that (1) E2 acting alone at the MnPN is (2) necessary and (3) sufficient to induce the changes in sleep seen with high hormone levels in cycling female rodents.

## **B. Materials and Methods**

### **1. Animals.**

Adult female Sprague–Dawley rats (250-350g) were purchased from Charles River Laboratories (Kingston, N.Y.) and housed in the Laboratory Animal Facilities at the University of Maryland, School of Medicine under a reversed 12 h: 12 h dark: light cycle (Lights on at 9PM for Chapter II and experiments 1 and 3 in Chapter III, lights on at 6AM for Chapter III, experiment 2.) with food and water available ad libitum. In all experiments, zeitgeber time 0 (ZT 0) represents Lights ON. Due to logistical limitations, all experimental procedures were run in multiple cohorts, with all experimental groups represented in each cohort. All procedures were performed in accordance with the National Institutes of Health guide for care and use of laboratory animals. All experiments were approved by and were in accordance with the guidelines of the University of Maryland Institutional Animal Care and Use Committee.

### **2. Gonadectomies and Transmitter/Cannula Implantation.**

All surgeries were conducted under isoflurane anesthesia. All animals were ovariectomized (OVX) or castrated according to standard protocol and simultaneously implanted with TL11M2-F40-EET transmitters (Data Sciences International, St. Paul, Minn.). Briefly, animals were OVX using a dorsal incision followed by isolation and removal of the ovaries bilaterally. Males were castrated using a similar dorsal incision followed by isolation and removal of the testes. Using the OVX incision for females or

with a separate dorsal incision for males, a bipotential- lead transmitter (DSI Inc., St. Paul, Minn.) was implanted intraperitoneally. Another incision was made along the midline of the head and neck to expose the skull and neck muscle. Two burr holes were drilled asymmetrically and stainless-steel screws (Plastics One, Roanoke, Va.) were implanted at 2 mm anterior/1.5 mm lateral and 7 mm posterior/1.5 mm lateral relative to the bregma. The four transmitter leads were threaded subcutaneously to the head incision. Electroencephalographic (EEG) leads were wrapped around the screws and secured with dental cement. Electromyogram (EMG) leads were implanted directly in the dorsal cervical neck muscle, approximately 1.0 mm apart, and sutured in place.

For experiments that required local injections into preoptic area nuclei (Chapter II experiments 2 and 3, Chapter III experiments 2 and 3) guide cannula were implanted. Three types of guide cannula were used. For MnPN infusion, a single guide cannula (C315G, 26-gauge; Plastics One) targeted to the MnPN was implanted at a 9° angle at the stereotaxic coordinates 0.45mm posterior/ +1.0mm lateral/ 6.5mm ventral relative to bregma. For microdialysis (Chapter III experiment 2), the same posterior and lateral MnPN coordinates were used, with a depth of 6mm using a microdialysis cannula (SciPro Inc. #MAB-6.14.G, Sanborn, N.Y.). For VLPO infusion (Chapter II experiment 2), a bilateral guide cannula (C235G, 26-gauge; Plastics One) targeted to the VLPO was implanted at the stereotaxic coordinates 0.1mm posterior/ 1.0mm lateral/ 7.0mm ventral relative to bregma. In all cases, the cannula and EEG leads were secured together with dental cement. Upon insertion of the cannula, the opening was closed with a matching dummy provided by the respective cannula manufacturer. The skin along the head was sutured around the guide and dummy cap, and the dorsal incision was closed with wound clips. Fig. 17 and 42 are representative

images of the guide cannula placement. All animals were treated with antibiotic ointment and topical lidocaine as well as carprofen (5 mg/kg) postoperatively and then allowed 7 days to recover before the start of the experiments.

### **3. Data Collection and Sleep Scoring.**

Home cages with the telemeter-implanted animals were placed on receiver bases that continuously collected EEG and EMG data at 500Hz and transferred the data to a PC running Dataquest (Chapter II experiments 1-2) or Ponemah (Chapter II experiment 3 and Chapter III) software (both DSI Inc., St. Paul, Minn.). Digitized signal data was scored off line using NeuroScore DSI v3.3.9 (DSI Inc., St. Paul, Minn.). The EEG/EMG signals were parsed into 10 second epochs. A Fast Fourier transform (Hamming window, 4096 samples) was used to break down the EEG frequency bands (Delta (0.5-4Hz), Theta (4-8Hz), Alpha (8-12Hz), Sigma (12-16Hz), Beta (16-24Hz) Gamma (24-50Hz) and Total (0.5-50Hz)). The mean of the absolute value was calculated for the EMG data (bandpass 20-200Hz). These data were exported to Matlab (Matlab R2015, Mathworks, Natick, Mass.) where vigilant states were automatically scored using a custom program developed by the lab (DJP). In the automated program, scoring decisions were based on threshold levels of EEG delta power, theta power, the ratio of delta to theta, and the EMG activity. Data were normalized to the mean of the entire recording, then the median for each signal was used as a threshold (see table 1 below). The scoring data was reimported into NeuroScore using a custom Matlab program courtesy of Dr. Michael Rempe. The automated scores were visually confirmed in NeuroScore and changes were made where necessary. Table 1 summarizes the gestalt paradigm used to assign sleep states, with determinations of low

and high made to each animal's median value for the given parameter. The NeuroScore program was used to compile total time spent in wake, NREM, and REM sleep.

The scored epochs were summed over the 12h dark phase and reported as the total time (in minutes) spent in each state (wake, total sleep, NREM sleep, and REM sleep). The percent change induced by E2 was calculated for each vigilance state: Percent change from oil baseline = [(estradiol\_time – baseline\_time) / baseline\_time] x 100.

| <b>EMG</b> | <b>Delta (0.5-4Hz)</b> | <b>Theta (4-8Hz)</b> | <b>Sleep State</b> |
|------------|------------------------|----------------------|--------------------|
| High       | High <b>OR</b> Low     | High <b>OR</b> Low   | <b>Wake</b>        |
| Low        | High                   | High                 | <b>NREM Sleep</b>  |
| Low        | High                   | Low                  | <b>NREM Sleep</b>  |
| Low        | Low                    | High                 | <b>REM Sleep</b>   |
| Low        | Low                    | Low                  | <b>Wake</b>        |

**Table 1. Scoring Paradigm.** This table describes sleep state scored by EEG/EMG inputs. Determinations of low and high are made relative to each animal's median value for the given parameter.

#### **4. EEG Spectral Analysis.**

NREM Slow Wave Activity (NREM-SWA; a marker of sleep homeostasis), was assessed via EEG spectral distributions of NREM sleep bouts. Here, the scored bouts of NREM sleep were imported into Matlab. EEG power spectra were computed between 0.5 - 20Hz in 0.25Hz stepwise bins. Each power bin was normalized to the mean total power

from the 24-hour baseline recording, then averaged into 6-hour epochs (ZT times 0-6, 6-12, 12-18, and 18-0).

## **5. Steroid Treatments.**

For experiment 1, all animals were administered 50uL of sesame oil on Day 1. Animals were subsequently administered 5 µg 17-β-estradiol benzoate in 50uL sesame oil (E2; Sigma-Aldrich, St. Louis, MO) on Day 2, and 10 µg E2 in 100uL sesame oil 24 h later on Day 3, or equivalent amounts (50uL/100uL) of sesame oil vehicle, through subcutaneous flank injections. On Day 4, animals received a dose of 500mg progesterone in 50µL sesame oil vehicle, or sesame oil vehicle control. Experiment 2 follows the same timing paradigm with the omission of the Day 4 progesterone injection. For experiment 3, 5ug cyclodextrin-encapsulated E2 in 5uL saline (Sigma-Aldrich), or 5uL free cyclodextrin vehicle (Sigma-Aldrich), was infused directly into the MnPN in each of three successive injections 24 hours apart. Experimental manipulation and sleep data collection was performed at times from 4 to 36 hours after the second hormonal injection (see specific experiments below).

## **6. Drugs and Infusion Paradigm.**

Animals in experiment 1 comprised a single group that all received ovariectomy and identical hormone replacement as described above, with each animal's individual baseline serving as a control. Animals in experiment 2 were randomly assigned into either the vehicle (VEH; 0.25% dimethyl sulfoxide (DMSO) in sterile saline) or ICI (50ng in 0.25% DMSO in sterile saline; Sigma-Aldrich) infusion groups, and reversed the following week for a second round of infusions. For targeted infusions to the VLPO, the dummy stylet was removed and replaced with a 33-gauge micro-infusion needle, which extends 2.0mm below

the tip of the guide cannula. For targeted infusions to the MnPN, the dummy stylet was removed and replaced with a 33-gauge micro-infusion needle (Plastics One), which extends 0.5mm below the tip of the guide cannula. The needle was connected to a Hamilton 1705 RNR 50ul syringe (Hamilton, Reno, NV) via polyethylene tubing. A BASi Bee pump and Bee Hive controller (Bioanalytical Systems, Inc., West Lafayette, IN) was used to deliver ICI or VEH at a rate of 0.1µl/min. Following infusion, the needle remained in place for 5 minutes to ensure diffusion. ICI or VEH was infused 3 times per injection: (i) 6-12h prior to, (ii) 30 minutes prior to and (iii) 12h after injections (Fig. 16). Similarly, animals in experiment 3 received targeted infusions to the MnPN of cyclodextrin-encapsulated E2 or cyclodextrin vehicle; the dummy stylet was removed and replaced with a 33-gauge micro-infusion needle (Plastics One), which extends 0.5mm below the tip of the guide cannula. The needle was connected to a syringe and controller as described above. The setup was used to deliver cyclodextrin-encapsulated E2 or cyclodextrin vehicle at a rate of 0.1µl/min. Following infusion, the needle remained in place for 5 minutes to ensure diffusion.

## **7. Cannula Placement Verification**

At the end of each experiment, animals were overdosed with a ketamine/acepromazine mix before being transcardially perfused with 0.9% saline + 2% sodium nitrite followed by 4% paraformaldehyde in 0.05M KPBS. The brains were removed and post-fixed overnight in 4% paraformaldehyde. Brains were cryoprotected in 30% sucrose in KPBS, frozen on dry ice, and stored at -80°C. Each brain was cut on a cryostat along the coronal plane at 30µm thick into 4 series and stored in an ethylene glycol-based storage solution at -20°C. Sections in each series are separated by 120µm.



Sections corresponding to the VLPO and MnPN from one series were mounted on 2% gelatin-coated slides. The slides were processed for cresyl violet (0.1% solution; cresyl violet acetate, Sigma-Aldrich) staining to examine cannula placement. VLPO hits were counted as placement within sections 32-36 of the brain atlas<sup>198</sup> and MnPN hits were counted as placement within sections 33-35. For experiment 2 in the VLPO, one animal was a miss and excluded from the study, while 3 animals were euthanized prior to completion and removed from the study. For all MnPN cannulations, animals with cannula placement outside of this area were removed from analysis; 3 animals were removed. There was 1 animal in experiment 2 whose cannula placement was a miss but remained in the analysis; this animal was infused with VEH and her behavior was not different from hits.

## 8. Statistical Analysis.

All data are represented as mean  $\pm$  SEM. Two-way, repeated measure ANOVAs followed by Sidak post-hoc tests were run for each vigilance state to determine if direct VLPO and MnPN infusions significantly altered E2 effects on sleep-wake. Since this was a within-animal study, systemic injection (oil vs. E2) was the repeated factor and infusion (VEH vs. ICI) was the independent factor. An *a priori* comparison of interest was between the VEH and ICI infused E2 days of analysis. We ran an unpaired t-test to compare means on the E2 day between VEH and ICI infused animals. T-tests were used to compare E2 and VEH MnPN infusions and two-way, repeated measure ANOVAs followed by Sidak post-hoc tests were run for analysis across the phase in 1h bins. Mann-Whitney U nonparametric tests were run to analyze differences between mean percent changes of each vigilance state. All statistical tests were conducted using the Graph Pad Prism program (San Diego, CA) on a PC. In all figures (\*) denotes significance at  $p < .05$ , (\*\*) denotes significance at  $p < .01$ ,

(\*\*\*) denotes significance at  $p < .001$ , and (\*\*\*\*) denotes significance at  $p < .0001$ .

## C. Results

*Experiments 1 and 2 were originally performed by, and data for Experiment 2 collected by, Danielle M. Cusmano, PhD. Except where noted data has been reinterpreted by PCS.*

### 1. Estradiol is the Ovarian Steroid that Predominantly Influences Sleep-Wake Behavior in the Adult Female Rat.

Our laboratory and others have demonstrated that exogenous E2 administration, which mimics the levels and timing of the fluctuations in endogenous hormones, markedly reduces time spent in NREM and REM sleep with a concomitant increase in the time spent in wake.<sup>6-8,80,110-111</sup> However, these previous findings have only analyzed the 24 hours after the last injection of E2. To further explore and establish this model of ovariectomy followed by hormone replacement, which mimics the natural rise of E2 to peak proestrus level<sup>80</sup> and also recapitulates the sleep patterns of intact females,<sup>7</sup> we recorded and analyzed sleep across the treatment paradigm. We ovariectomized (OVX) female rodents and replaced E2 and progesterone globally through subcutaneous injection, in a cycle formulated to mimic endogenous hormone steroid levels. This replacement paradigm consists of an oil dose on Day 1 designed to mimic metestrus, a low 5ug E2 dose on Day 2 designed to mimic diestrus, and a high 10ug E2 dose on Day 3 designed to mimic proestrus.<sup>80</sup> (See “Steroid Treatments” in section II-B-3.) The advantage of this established model (ovariectomy; OVX + exogenous E2 replacement that mimics the gradual natural rise of E2 to peak proestrus levels) is the standardization and reproducibility of circulating E2 levels on specific recording days. Following the second E2 treatment, the animals were

divided into two groups and administered a physiological dose of progesterone (1mg; based on our established findings<sup>7</sup> or vehicle (referred to as Post E2) on Day 4. (Fig. 7).

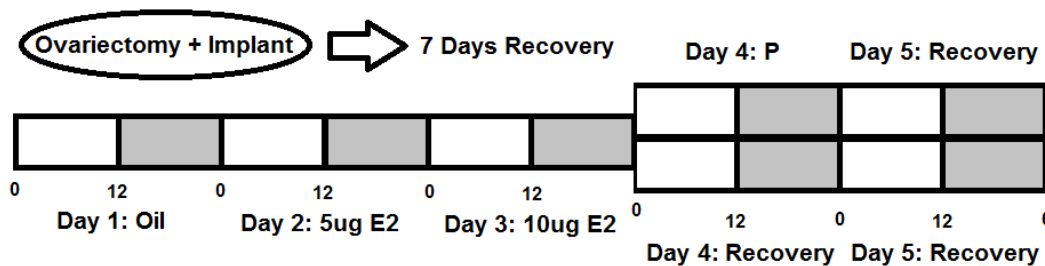

**Fig. 7. Timeline of Hormonal Recapitulation Experiment.** Ovariectomized Female Sprague-Dawley Rats (n=17) were administered an oil injection on Day 1, 5ug of E2 on Day 2, and 10ug of E2 on Day 3. On Day 4, the animals were split into two groups, with one group being administered progesterone to mimic the estrous hormone milieu and one group being administered vehicle to solely examine the effect of E2. Sleep times were measured using EEG/EMG telemetry (DSI Inc. St. Paul, Minn.)

#### a. Proestrus-Level Estradiol is Sufficient to Suppress Sleep

As anticipated, in the dark phase, E2 significantly increased the time spent in wake at the expense of NREM. This change was present on the day of high E2 administration. (Fig. 8-9-10) compared to the oil baseline.

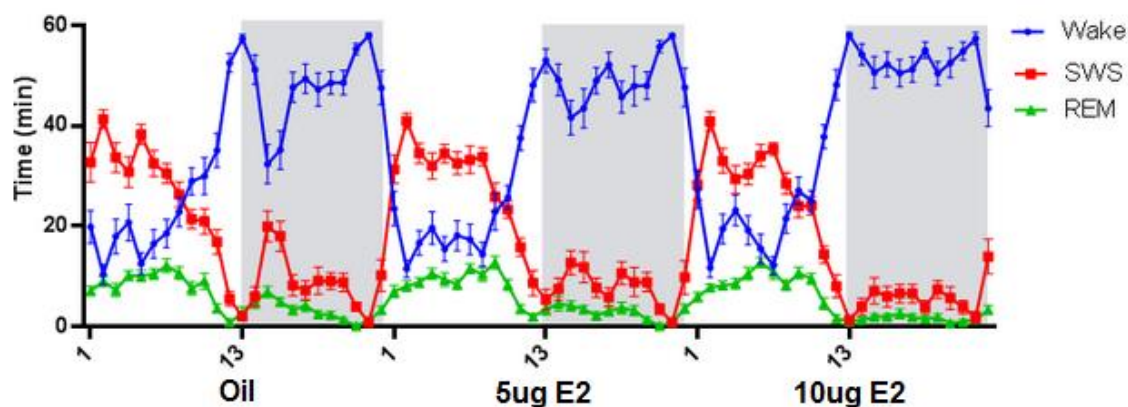

**Fig. 8. Proestrus-level E2 Suppresses Sleep and Increases Wake.** Using a within animal design, we recorded EEG/EMG data from OVX adult rats treated with our standard dosing paradigm of 2 injections of E2 24 hours apart. On the day of high-dose E2 administration (Day 3), mimicking proestrus hormone levels, there is an increase in wake time and decrease in slow wave sleep time. This sleep change mimics the change in sleep on proestrus in naturally cycling rodents. (Repeated measure ANOVA; Wake main effect of treatment:  $F(2,29)=13.37$ ,  $p<0.0001$ ); (Repeated measure ANOVA; NREM main effect of treatment:  $F(2,29)=14.15$ ,  $p<0.0001$ ).

Conversely to the changes in wake (Fig. 9A), there was a significant decrease in NREM sleep time in the dark phase on the day of high E2 administration (Fig. 9B). E2 administration also significantly decreased REM sleep. (Fig. 9C)

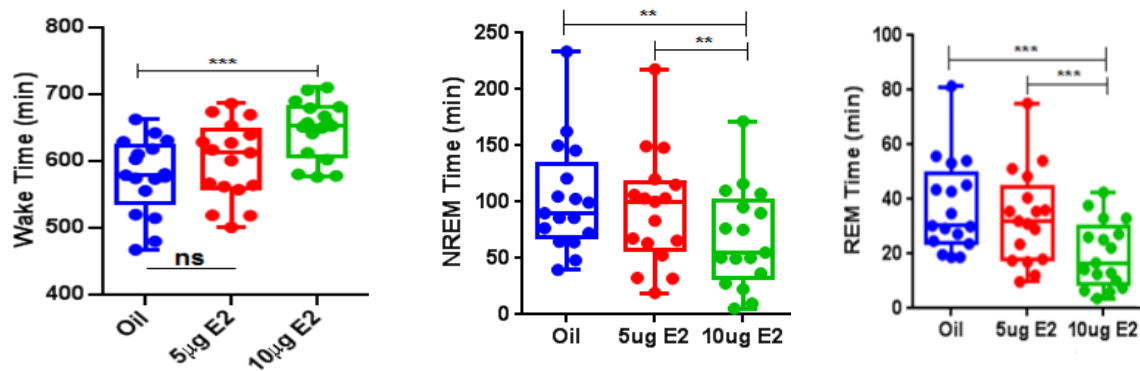

**Fig. 9 A-B-C. E2 Increases Total Dark Phase Wake Time and Decreases Total NREM and REM Sleep Time.** (A) In the dark phase, animals showed a significant increase in wake time relative to oil on the day of high-dose E2 treatment ( $p=0.0005$ ). The low-dose E2 treatment did not have a significant effect on wake, while the progesterone-treated animals did not show a significant difference in wake from their E2-only treated counterparts on the same day. (Repeated measure ANOVA; Wake main effect of treatment:  $F(2,29)=13.37$ ,  $p<0.0001$ ). (B) The high-dose E2 showed a significant decrease in NREM sleep time in the dark phase compared to both oil ( $p<0.01$ ) and low dose E2 ( $p<0.01$ ). (Repeated measure ANOVA; NREM main effect of treatment:  $F(2,29)=14.15$ ,  $p<0.0001$ ) (C) The high-dose E2 showed a significant decrease in REM sleep time in the dark phase compared to both oil ( $p<0.001$ ) and low dose E2 ( $p<0.001$ ). (Repeated measure ANOVA; REM main effect of treatment:  $F(2,29)=15.43$ ,  $p<0.0001$ )

It is interesting to note that on the day analogous to proestrus (Post E2), E2 treatment abolished the mid-phase siesta by markedly increasing wake at ZT 14-16 compared to the baseline and low E2 days (Fig. 10). This effect was not present in the light phase, with no significant change in light phase sleep time noted across any of the treatment days. (Fig. 11)

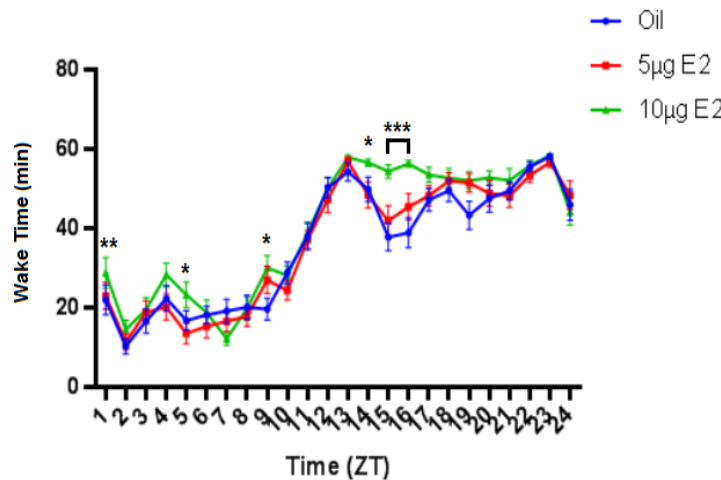

**Fig. 10. E2-mediated Sleep Suppression is Most Prevalent in the Early Dark Phase.**

Analysis of the sleep time by hour across the treatment days, shows that wake time is not significantly different between the oil and low dose E2 at any treatment time. However, the high-dose E2 treatment showed a significantly higher wake time at six hourly time points, with the effect being particularly pronounced in the early dark

phase (ZT-14-16) (Repeated Measure 2-way ANOVA; Main effect of treatment  $F(2,48)=46.50$ ;  $p<0.0001$ . Sidak's multiple comparison test, Oil vs. 10ug E2, ZT 1  $p<.01$ , ZT5  $p<.05$ , ZT 9  $p<.05$ , ZT 14  $p<.05$ , ZT 15  $p<.001$ , ZT 16  $p<.001$ )

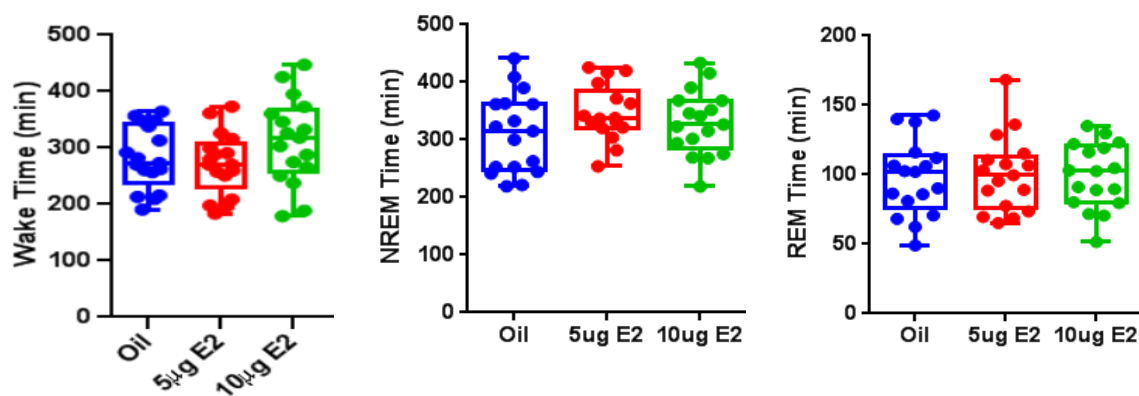

**Fig. 11. E2 does not Affect Total Sleep or Wake Time in the Light Phase.** There is no significant difference in (A) wake time, (B) NREM sleep duration, or (C) REM Sleep Duration across any treatment.

## b. Progesterone Has No Significant Additional Effect on Sleep-Wake States

After showing the effects of E2 alone, a question remained over whether progesterone, which also rises on the afternoon of proestrus in natural cycling females, is influencing sleep and wake. Thus, to further validate our model, following the second E2 treatment, on Day 4 the animals were divided into two groups and administered a physiological dose of progesterone (P; 1mg, which is a dose relevant to endogenous proestrus levels)<sup>199</sup> or vehicle (referred to as Post E2). Moreover, we also analyzed sleep

times with and without progesterone. We found that progesterone had no significant effect on sleep-wake states, either wake, NREM, or REM, when compared to the analogous Day 4 (Post E2) day (Fig. 12A-B-C).

**Fig. 12 A-B-C. Progesterone does not Affect Sleep Times.** To compare for the effect of Progesterone, we split the cohort into two treatment groups on Day 4, one receiving progesterone on the day after high estrogen, recapitulating the estrus phase, and one receiving no additional treatment. There was no significant difference between the groups in (A) wake time, (B) NREM sleep time, or (C) REM Sleep Time. (Mixed Effect Model: treatment x time, Wake:  $F(4.08,46.9)=1.12$ , NREM:  $F(4.08,46.9)=1.15$ , REM  $F(4.08,46.9)=1.18$ )

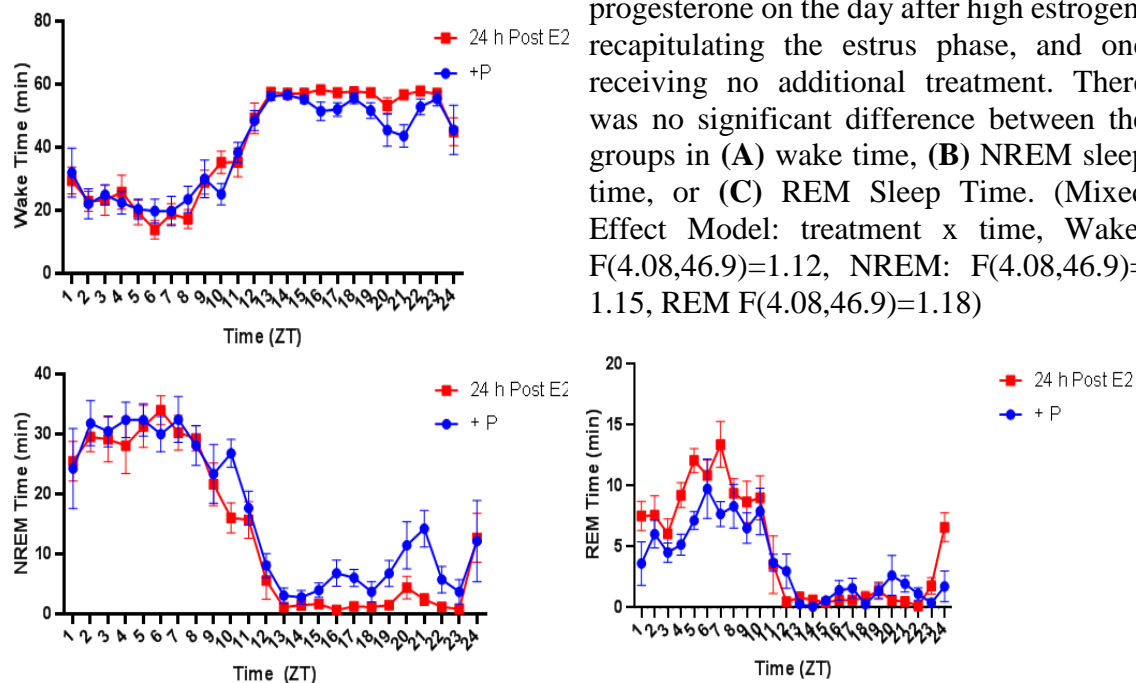

Furthermore, we also analyzed NREM delta (0-4 Hz) power through Fourier transformation of the EEG signal, a widely used<sup>200-201</sup> measure of the depth of homeostatic sleep, both with and without progesterone. When normalizing delta power to each animal's baseline oil day (Day 1), we found no significant change in the relative delta power difference between progesterone-treated and untreated animals. However, in both groups, there was a decrease relative to oil baseline in the E2-treated animals (Fig. 13). Thus, these findings validate the ovariectomy + exogenous E2 (alone) model as a reliable experimental system that is amenable to local manipulation of sleep-active nuclei to more directly test how estrogens modulate the sleep-circuits and elicit changes in sleep behavior, and show

that global E2 action alone is sufficient to recapitulate sleep changes in naturally cycling rodents.

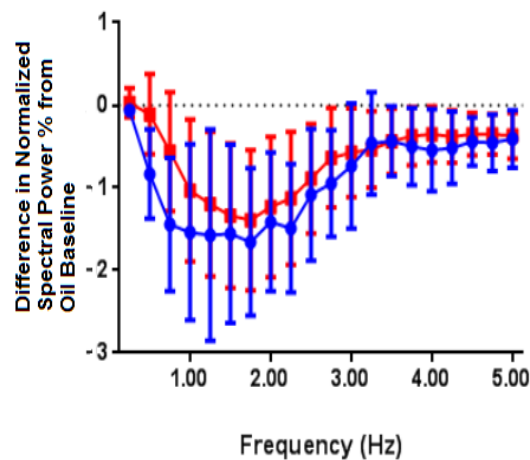

**Fig. 13. Progesterone Produces No Change in EEG Spectral Power.** We compared power spectra of the progesterone and non-progesterone treated groups on Day 4 relative to their own Day 1 oil baseline. In both groups, we see a decrease in spectral power on the day of progesterone treatment, with no significant difference between the progesterone treated and E2 only groups.

### c. Estradiol Decreases NREM-SWA Spectral Power

To investigate these EEG power spectrum findings (Fig. 13) further, we examined the differences in EEG power between oil-treated and post-E2/E2+P animals, comparing each animal's Day 1 and Day 4 readings. The power frequency distribution of dark phase NREM-SWA from the females used in the progesterone experiment was compared between Oil versus the day post-E2, which represents the period of the greatest NREM sleep loss following E2 administration, with or without progesterone. We found that there was no significant change in power across all sleep states during either the first half (Fig. 14A) or second half (Fig. 14B) of the light phase. However, during the dark phase, significant changes were observed. Given the significant decrease in dark phase NREM sleep (~40%), we expected the NREM-SWA frequency distribution in the 0.5-4.0 Hz bands to be significantly greater following E2 treatment. However, E2-treated animals, both with and without progesterone, showed a significant *decrease* in EEG power in the low frequency ranges, particularly in the delta band. (Fig. 14C) Comparisons of the normalized



percent of total power spectral distribution revealed that E2 significantly decreased the dark phase power of the 1-2.5 Hz bands, which typically represent the highest level of cortical synchronization and thus high-quality sleep, suggesting a decreased level of deep, homeostatically restorative sleep. In the second half of the light phase, the effect of lowered EEG power with E2 was less-pronounced, (Fig. 14D) but appeared to be present over a broader range of frequencies, including in the theta band. These results suggest that the decrease in NREM sleep time in E2 also manifests as a decreased level of deep, homeostatically restorative sleep, and that E2 may attenuate the build-up of SWA under normal physiological conditions.

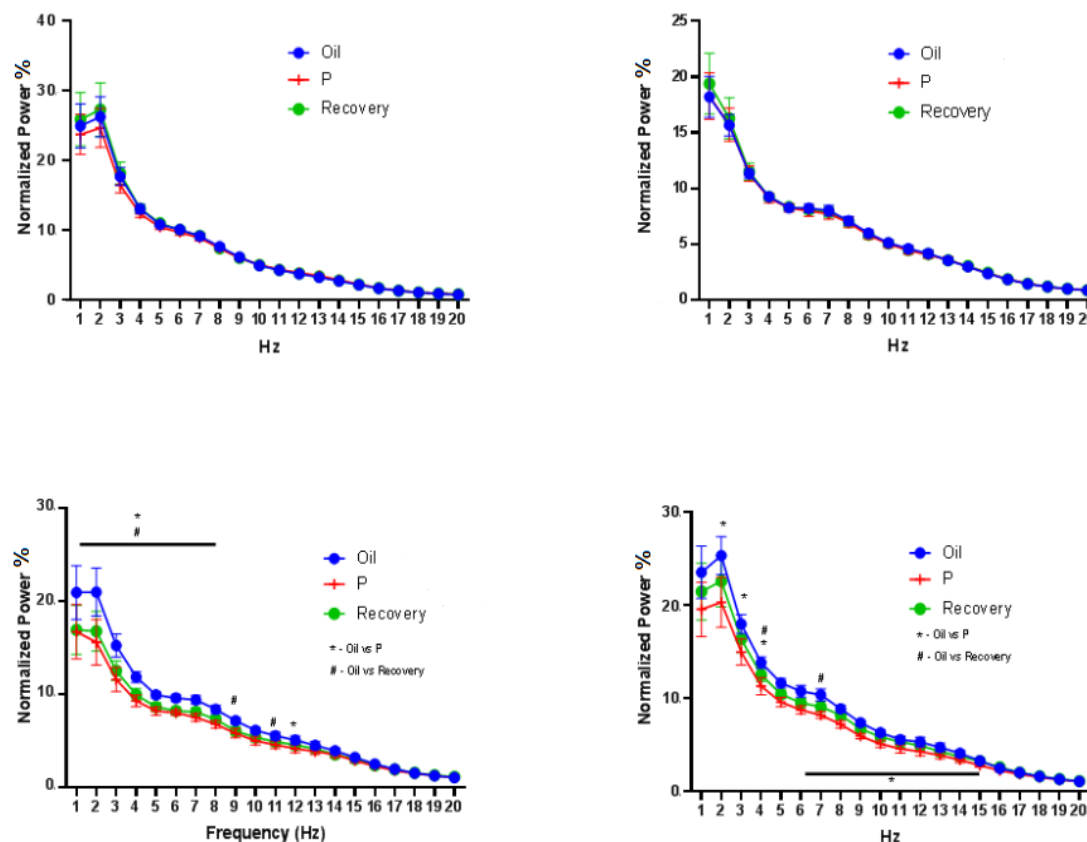

**Fig. 14 A-B-C-D. E2 Decreases Spectral Power in the Dark Phase, Particularly in the Delta Band.** We examined the spectral power across all animals on Day 1, the day of oil treatment (Oil), Day 4, the day of progesterone treatment (P) following E2, or the following Day 5 (Recovery). (See Fig. 7) There was no significant change in spectral



power at any frequency in the light phase, either the ZT 0-6 early portion (**A**) or the ZT 6-12 later portion (**B**). In the dark phase, however, there was a pronounced decrease in normalized power at low frequencies, particularly in the delta and theta ranges in the first half of the dark phase ZT 12-18 (**C**), when sleep times are most affected by E2. These low power ranges have been shown to be important for homeostatically restorative sleep. (REML Mixed-Effects model with multiple comparisons, main effect of hormone,  $F(19, 200) = 105.9$ ,  $p < .001$ , interaction of hormone X time,  $F(57, 580) = 1.484$ ,  $p < .05$ ) In the second half of the dark phase ZT18-0 (**D**) there was a significant decrease in the Theta and Alpha frequency ranges as well as the Delta. (REML Mixed-Effects model with multiple comparisons, main effect of hormone,  $F(19, 200) = 141.0$ ,  $p < .0001$ , interaction of hormone X time,  $F(57, 580) = 1.901$ ,  $p < .001$ )

## **2. Estrogen Receptor Antagonist Action at the MnPN but not the VLPO of Adult**

### **OVX Females Attenuates Estradiol Mediated Suppression of Sleep.**

#### **a. ER Alpha Expression is Present at High Levels in the Female MnPN but not the VLPO.**

Building on those results, we next attempted to determine if the POA circuitry is necessary to drive these effects. Over the past decade, numerous studies using various techniques have convincingly demonstrated that neurons in the VLPO and the MnPN are involved in sleep-regulatory mechanisms.<sup>159-160</sup> The VLPO and MnPN reportedly have complementary roles in the maintenance of sleep, as they both (i) have a predominant number of sleep-active cells (i.e., the number of Fos-ir neurons increases following episodes of sustained sleep but not sustained waking),<sup>84,160</sup> (ii) have a high concentration of neurons with elevated discharge rates during both NREM and REM sleep compared to waking (i.e. sleep-active discharge pattern),<sup>172</sup> and (iii) are thought to function to promote and sustain sleep by inhibiting key arousal centers via descending GABAergic (MnPN) and GABAergic/galaninergic (VLPO) projections.<sup>166,169-171</sup> Here we investigate whether estrogen receptors were present in these sleep-associated nuclei. Immunocytochemistry using polyclonal antibodies against ER alpha demonstrated a significantly greater

population of ER alpha positive cells in the MnPN compared to the VLPO (Fig. 15). These findings show that the MnPN appears to be the major seat of E2 sensitivity in these active sleep circuits.

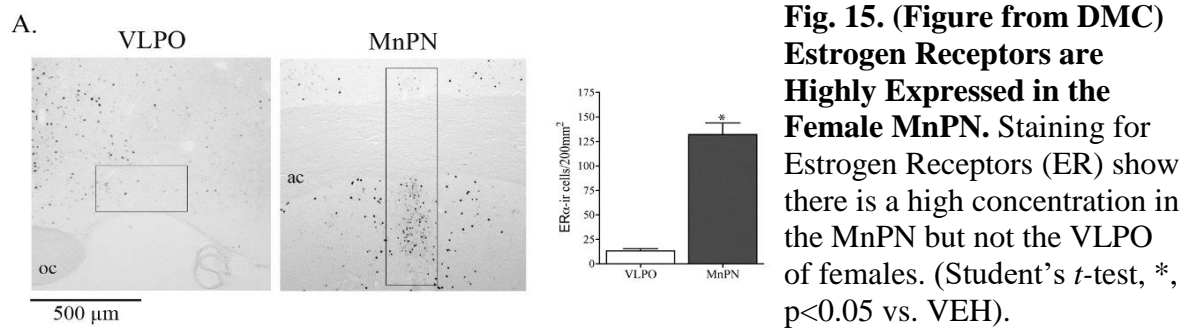

## b. ER Antagonist Infusion to the MnPN Partially Rescues E2-Mediated Sleep

### Suppression

Building on the presence of E2-receptors in these nuclei, we attempted to test if the MnPN is necessary to mediate E2 actions on NREM sleep. Using the same exogenous E2 replacement paradigm shown to produce effects on sleep, we then cannulated the VLPO and the MnPN and infused ICI-182-780 (ICI), an estrogen receptor (ER) antagonist. This study attempts to determine if estrogen receptor (ER) signaling is required in either region for E2 suppression of sleep. These experiments show that blocking ER signaling at the MnPN, but NOT the VLPO, is able to ameliorate E2-mediated sleep suppression.

Due to greater expression of ER alpha in the MnPN, we ran a preliminary cohort of infusion of the direct estrogen receptor antagonist ICI 182,780 (ICI) into the MnPN. OVX rats were hormonally replaced with E2 or Oil, using the same paradigm as in experiment 1. However, on days of E2 administration, an ER agonist, ICI, was also infused locally into the MnPN. (Fig. 16). Cannula targeting was confirmed by histology (Fig. 17).

**Fig. 16. Timeline of ER Antagonism Experiment.** Ovariectomized Sprague-Dawley rats ( $n=15$ ) were treated with hormone replacement of either E2 or Oil using the same paradigm

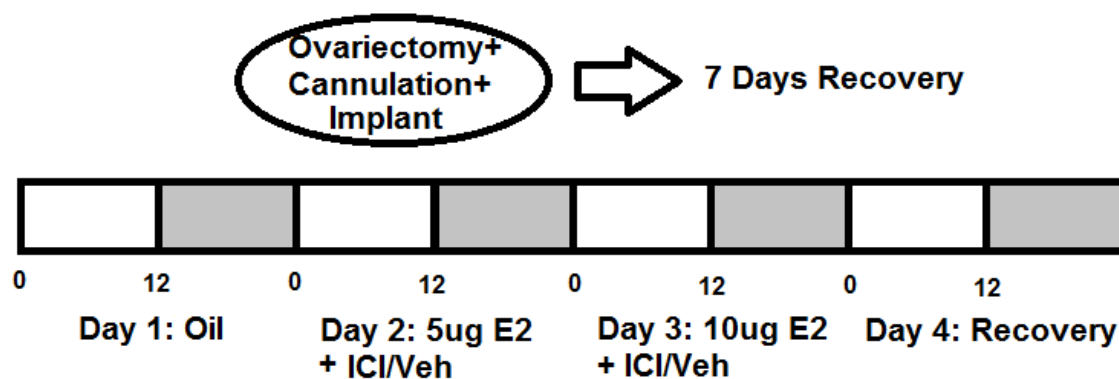

as in fig. 1-3 (5ug Day 1, 10ug Day 2) and cannulated to the MnPN. A subset of the animals (n=8) were treated as well with the Estrogen Receptor antagonist ICI through direct local infusion to the MnPN and the others (n=7) were treated with vehicle. Sleep behavior measured with EEG/EMG telemetry (DSI Inc., St. Paul MN).

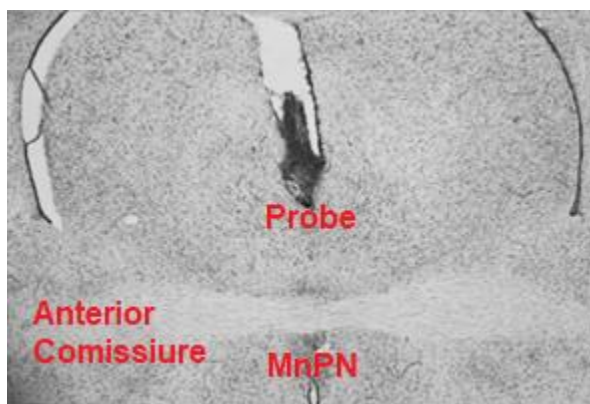

**Fig. 17. Representative Image of MnPN Probe Placement.** Probe placement to the MnPN was confirmed histologically.

The effects of ICI in the MnPN on E2 suppression of sleep were moderate to high for wake ( $d = 0.67$ ), total sleep ( $d = 0.67$ ), NREM sleep ( $d = 0.5$ ), and REM

sleep ( $d = 1.36$ ), prompting further investigation. In all groups, systemic E2 significantly modulated sleep-wake behavior; there was a main effect of E2 treatment for wake, total sleep, NREM sleep, and REM sleep during the dark phase. E2 treatment increased the time spent in wake and decreased sleep, both NREM sleep and REM sleep during the dark phase. In this study, pairwise comparisons of VEH infused animals given oil then E2 revealed that E2 treatment increased wake duration and decreased total sleep and REM

sleep. Direct infusion of ICI into the MnPN significantly attenuated these effects during the dark phase, for both Wake and NREM sleep (Fig. 18A-B).

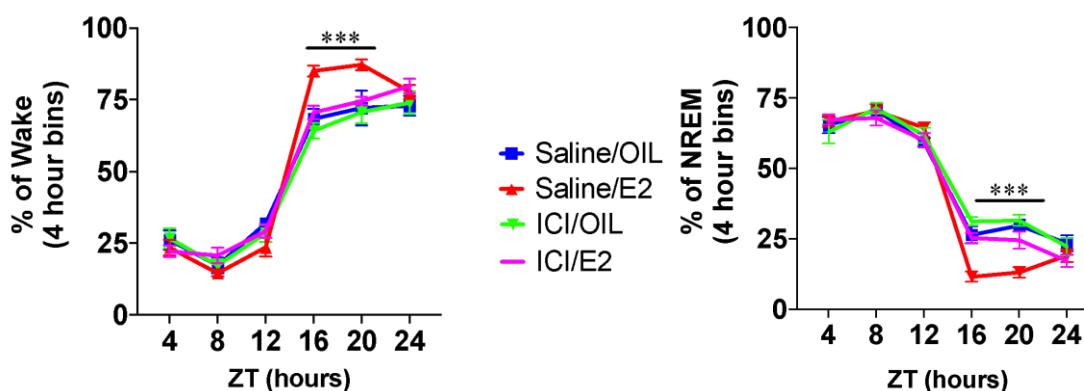

**Fig. 18 A-B. ER Antagonist ICI Reduces Wake Time and increases NREM Sleep Versus E2 Replacement.** (A) Injection of ICI against a background of E2 treatment reduced wake time across much of the dark phase, with statistically significant decreases from ZT 12-16 ( $p < .001$ ) and ZT16-20 ( $p < .001$ ). There was no significant difference between ICI-treated and ICI-untreated animals without E2 replacement. (B) Injection of ICI against a background of E2 treatment increased NREM time across much of the dark phase, with statistically significant increases from ZT 12-16 ( $p < .001$ ) and ZT16-20 ( $p < .001$ ). There was no significant difference between ICI-treated and ICI-untreated animals without E2 replacement. Main effect of E2 treatment for wake, ( $F_{1,12} = 53.48$ ,  $p < 0.001$ )/ ( $t_5 = 2.56$ ,  $p = 0.05$ ), total sleep ( $F_{1,12} = 53.48$ ,  $p < 0.001$ )/ ( $t_5 = 2.68$ ,  $p = 0.04$ ), NREM sleep ( $F_{1,12} = 39.93$ ,  $p < 0.001$ ) and REM sleep ( $F_{1,12} = 57.03$ ,  $p < 0.001$ )/ ( $t_5 = 2.78$ ,  $p = 0.04$ ) during the dark phase.

Animals who received direct infusions of ICI into the MnPN acquire about 47 minutes less wake than VEH and about 37 more minutes of NREM sleep and 10 more minutes of REM sleep (Fig. 19) during the dark phase. The percent change in wakefulness induced by E2 was not significantly different between VEH and ICI infusion groups. However, the percent changes in total sleep, NREM sleep, and REM sleep induced by E2 were significantly attenuated by ICI during the dark phase. As anticipated, the saline/E2 treated animals had significantly increased wake and reduced NREM sleep during the dark phase following the last injections. However, treatment with ICI (ICI/E2) blocked this E2 mediated effect, partially rescuing keeping NREM and REM sleep, and inhibiting

additional wake, to near baseline levels (Fig. 19). Keeping with the lack of significant effect of E2 in the light phase (Fig. 11), there was no effect of ICI on sleep times in the light phase (Fig. 20).

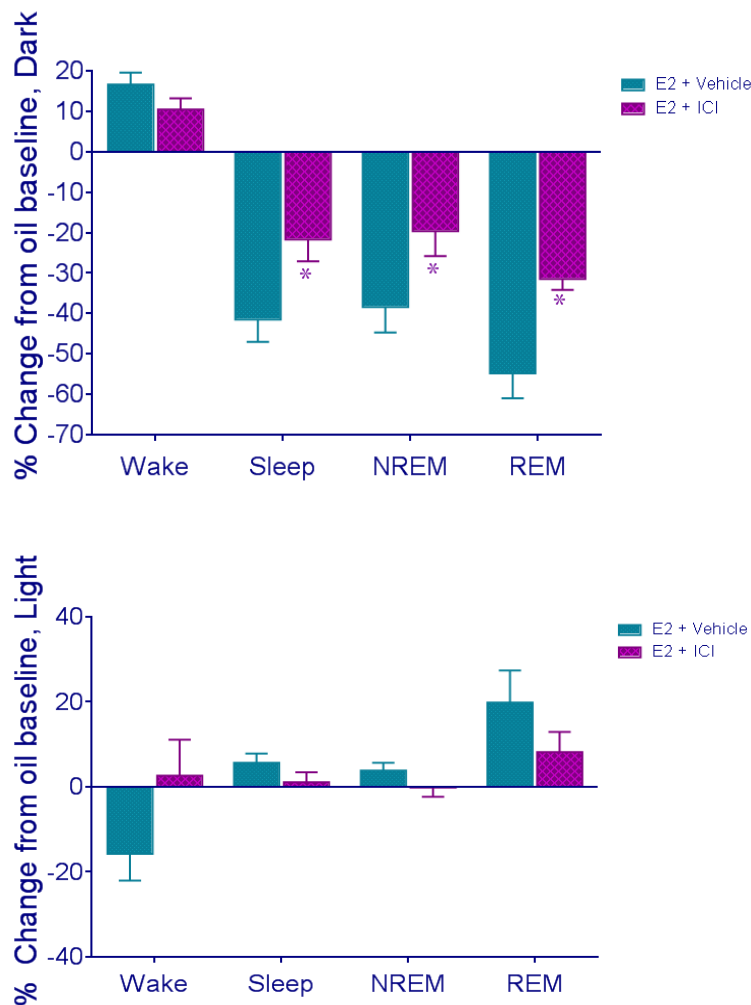

**Fig. 19. ICI Treatment Partially Rescues E2-Mediated Dark Phase Sleep Suppression.**

We also compared total sleep time relative to each animal's oil baseline recording, both with E2 treatment and vehicle and E2 and ICI treatment. (F) During the Dark Phase, ICI treatment partially rescued the E2-mediated decrease in sleep, both in NREM and REM phases, leading to an increase in sleep time relative to E2+Vehicle animals. (Dark phase two-way ANOVA; main effect of treatment, Wake:  $F(3,26) = 9.157$ ;  $p < 0.0005$ , NREM:  $F(3,26) = 14.86$   $p < 0.0001$ ) Wake ( $t_{12} = 2.376$ ,  $P = 0.04$ ) NREM sleep ( $t_{12} = 2.158$ ,  $p = 0.05$ ) REM sleep ( $t_{12} = 2.518$ ,  $p = 0.03$ )

**Fig. 20. ICI does not Significantly Change Sleep in the Light Phase.**

As E2 did not have significant effects on sleep in the light phase relative to oil baseline, there was no effect of ICI antagonism of ERs in the light phase relative to E2 treatment alone.

### c. ER Antagonist Infusion to the VLPO Does NOT Rescue Sleep Behavior

Conversely to the MnPN, in the VLPO, infusions of ICI in the presence of systemic E2 had no effect on NREM or wake. Findings suggest that ICI infusion into the VLPO does not attenuate E2 effects on wake and sleep (Fig. 21A-B). Therefore, our data

demonstrate that E2 acting directly in the MnPN and *not* the VLPO is necessary to attenuate NREM sleep, and that the inhibitory effect of E2 on sleep behavior is mediated by E2-expressing cells in the MnPN.

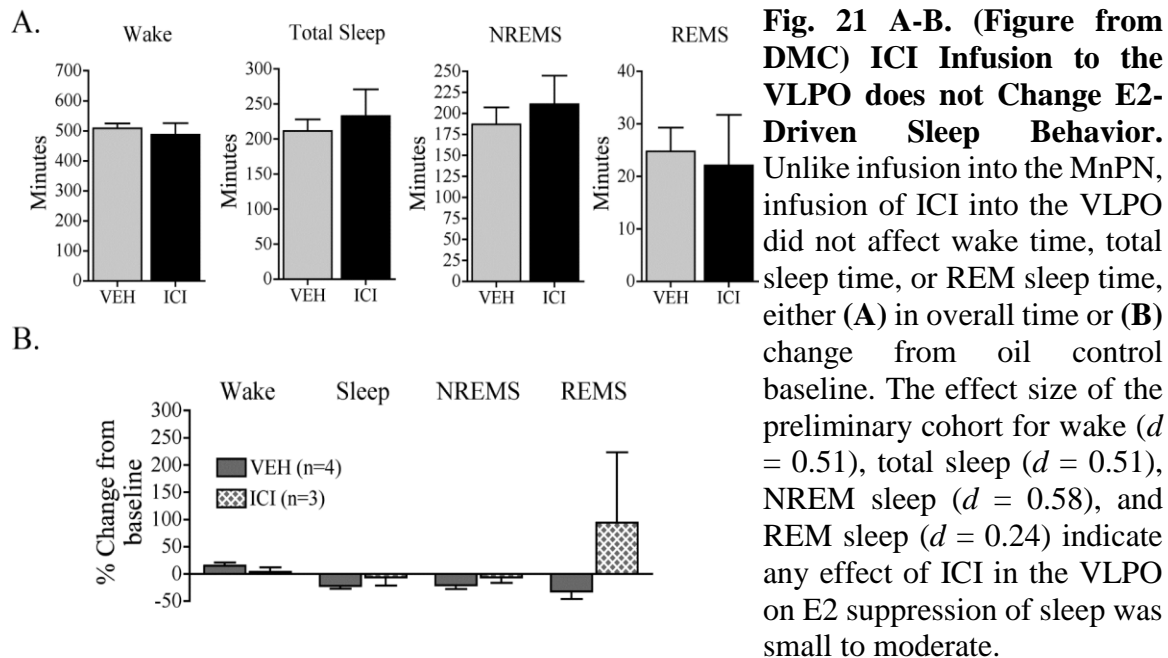

### 3. Direct Infusion of Estradiol into the MnPN Increases Wake and Suppresses Sleep.

Finally, we investigated whether E2 is sufficient to suppress sleep. To test this aspect of the signaling, we replaced the global subcutaneous administration of E2 with direct local infusion into the MnPN, to determine if E2 acting specifically at that nucleus is sufficient to reduce sleep. These studies will address whether estrogen receptor signaling in the VLPO and/or the MnPN is the key site of action for the E2-mediated suppression of sleep in metrics of both necessity and sufficiency. OVX female rats were implanted with EEG/EMG telemeters and guide cannula to the MnPN. After recovery, animals were infused with 3 doses of cyclodextrin- encapsulated E2, a water soluble form of E2, or equivalent amount of free cyclodextrin vehicle. This treatment was performed over 3 successive days at ZT18. (Fig. 22).

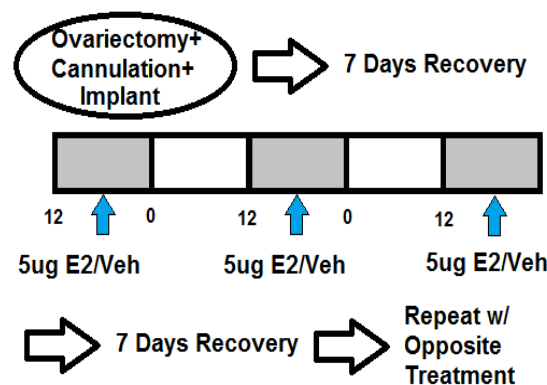

**Fig. 22. Timeline of Direct E2 Infusion Experiment.** Female Sprague-Dawley rats (n=9) were ovariectomized and implanted with EEG/EMG telemeters and guide cannula to the MnPN. After recovery, animals were infused at ZT18 with 5ug cyclodextrin- encapsulated E2 in 5uL sterile saline, or 5ug cyclodextrin vehicle in 5uL sterile saline. The same treatment was repeated for 3 successive days. After a 4-day washout, animals were subjected to the other treatment. Sleep architecture was quantified.

The significant differences in wake and NREM sleep were observed only in the light phase following the second injection. E2 infusion showed sleep suppression during

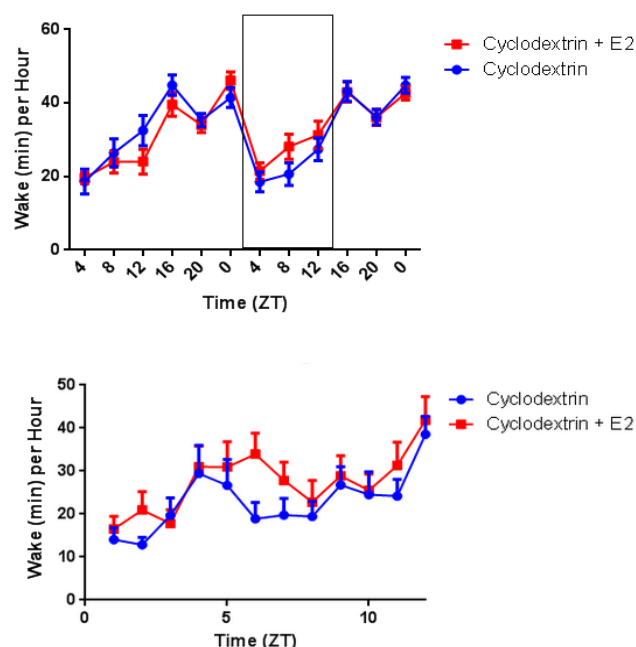

the light phase on the second day of treatment, which significantly increased wake (Fig. 23) and decreased NREM sleep (Fig. 24) over the entirety of the light phase. There was no change in REM sleep (Fig. 25). In agreement with previous results showing a lack of hormone effects on sleep in males,<sup>8</sup> ICI treatment showed no effect in males.

**Fig. 23 A-B. Direct E2 Infusion Increases Dark Phase Wake.** E2-treated animals showed an increase in wake time in the 2<sup>nd</sup> light phase (p=.03, two-way ANOVA, main effect from ZT0-12 on treatment day 2). Lower Panel is increased detail of boxed region.



**Fig. 24 A-B.** Direct E2 Infusion Tends Toward a Decrease in Dark Phase NREM Sleep. There was no significant difference in NREM sleep time between the two groups, though the E2-treated animals did show a trend ( $p=.10$  main effect, two-way ANOVA ZT 0-12 day 2 of treatment) toward lower sleep time in the second light phase.

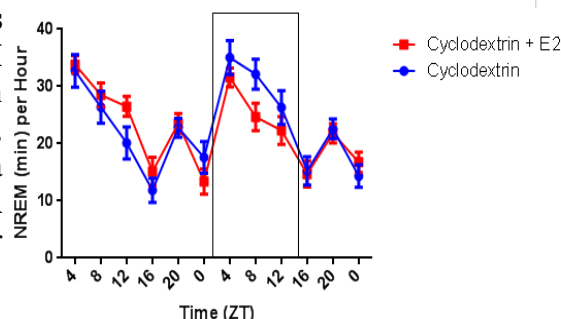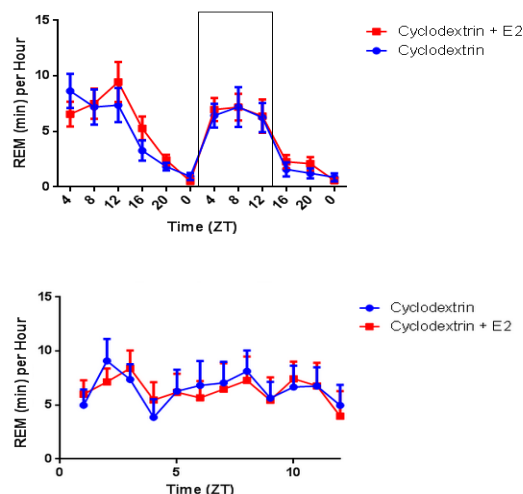

**<Fig. 25 A-B.** Direct E2 Infusion Has No Significant Effect on REM Sleep. There was no significant difference in REM sleep time between the two groups.

### a. Estradiol Infusion Decreases NREM-SWA

We analyzed EEG spectral power in the second light phase with and without E2. While there was no significant change in NREM Delta Power over the entirety of the experiment, analysis of the second light phase showed decreases in delta power across many time points, particularly in the early part of the period (Fig. 26)

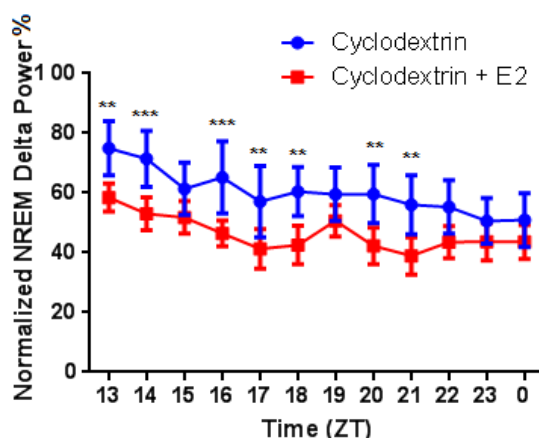

**Fig. 26. E2 Infusion Decreases NREM Delta Power.** We analyzed the spectral power with and without E2. NREM Delta Power from E2-treated animals shows a significant decrease in several time points in the second light phase relative to oil controls. (Repeated Measures two-way ANOVA, main effect of hormone,  $F(1, 9) = 3.228$ ,  $P = 0.1059$  post-hoc Sidak's multiple comparison test, ZT 13  $p < .01$ , ZT 14  $p < .001$ , ZT 16  $p < .001$ , ZT 17-18  $p < .01$ , ZT 20-21  $p < .01$ )



Further spectral analysis of this period shows that the effect is concentrated in the lowest frequencies of the delta band (below 2Hz), showing a decrease in the most coordinated brain waves that signify deep homeostatic sleep. (Fig. 27) Together, these findings strongly suggest that the MnPN is a direct mediator of E2 actions on sleep, and that E2 action at the MnPN is both necessary and sufficient for estrogenic effects on sleep.

**Fig. 27. Direct Infusion of E2 Changes Power Most Significantly in the Low Delta Band.**

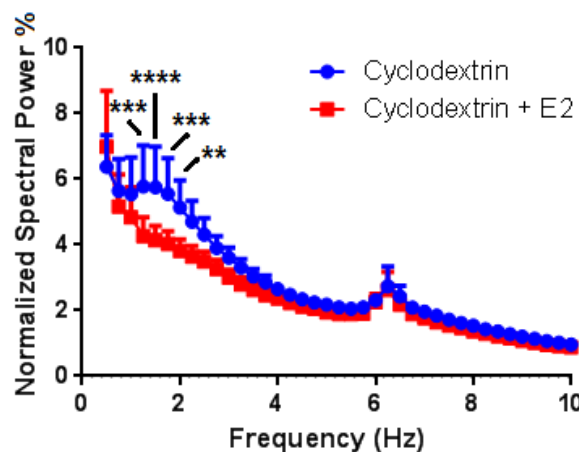

Spectral Fourier analysis revealed the decrease in delta power was localized to a particular portion of the low delta band, with the difference between E2 and vehicle significant at the 1.25 ( $p < .001$ ), 1.5 ( $p < .0001$ ), 1.75 ( $p < .001$ ), and 2 ( $p < .01$ ) Hz bands. (Repeated Measures two-way ANOVA, main effect of hormone,  $F(1, 9) = 4.129$ , post hoc Sidak's multiple comparison test, 1.25Hz band  $p < .001$ , 1.5Hz band  $p < .0001$ , 1.75Hz band  $p < .001$ , 2Hz band  $p < .01$ ).

## D. Discussion

Previous research studies using rodent models describe the changes in sleep across the female estrous cycle and following gonadectomy.<sup>7-8,76,80</sup> Studies consistently reported that E2 suppresses NREM sleep and REM sleep in females, while changes in gonadal steroids cause little to no change in sleep in males. Here, we sought to address the mechanism by which proestrus levels of cycling ovarian steroids suppress sleep in females. We show that after hormone replacement of proestrus levels of E2, the suppression of sleep by endogenous hormones may be recapitulated. We further show that this suppression is due to the high levels of E2 alone, and that progesterone, the other major circulating ovarian steroid, did not have a significant impact on sleep behavior. Extending these findings, we found that E2 has direct actions within the sleep-active POA, specifically in the MnPN,

which contains estrogen receptors (ERs). Antagonizing of ERs in the MnPN, but not the VLPO, attenuated the E2-mediated suppression of both NREM and REM sleep. We finally found that, in addition to E2 actions at the MnPN being necessary for E2 suppression of sleep, it is also sufficient, as the direct infusion of E2 into the MnPN suppressed sleep with no other intervention. Based on our findings, we predict that proestrus levels of E2 alone, acting at the MnPN, mediate sex-hormone driven suppression of sleep in female rats.

From our findings, we further predict that E2 is both necessary and sufficient to reduce the activation of MnPN sleep active cells, thereby releasing the inhibitory tone on downstream targets. The MnPN contains GABAergic sleep-active projection neurons, which innervate the lateral hypothalamus and multiple brainstem nuclei.<sup>166</sup> GABAergic MnPN neurons have direct inhibitory control over the orexinergic neurons in the perifornical area/ lateral hypothalamus.<sup>167</sup> These orexinergic neurons are a key source of arousal signaling, suggesting a sleep-promoting mechanism of the MnPN. Since ICI had little to no effect within the VLPO, while E2 in the MnPN was sufficient to induce changes, E2 is most likely acting predominantly on the MnPN and *not* acting directly on the neural circuits of the VLPO. However, as the MnPN also innervates the VLPO,<sup>168</sup> a decrease in MnPN activation by E2 may elicit a similar decrease downstream in the VLPO. Additionally, the sex difference in MnPN ER $\alpha$  expression may account for the difference in sensitivity of males and females to the suppressive effects of E2 on sleep.<sup>8</sup>

## **1. Potential Molecular and Neurological System Mechanisms of Estradiol Effects on Sleep**

Beyond the question of a site of action, the question of how, in terms of molecular and neurological mechanism, E2 may be mediating sleep effects is an important one. Two

distinct systems govern aspects of sleep regulation, the circadian wake system and the homeostatic sleep pressure system, which operate in concert to generate an overall sleep pressure that is responsive to both the animal's intrinsic homeostatic needs as well as external factors such as the light-dark cycle. The homeostatic sleep pressure system, which governs the amount of sleep needed after a given period of wake to maintain homeostasis, independent of circadian factors, is thought to utilize both the VLPO<sup>159</sup> and MnPN<sup>5</sup> as key originators of this pathway. The VLPO and MnPN send GABAergic projections to key mediators of the wake state, including nuclei in the lateral hypothalamus governing the orexinergic wake system.<sup>5</sup> Additionally, the VLPO and MnPN have been shown as sites of sensitivity to adenosine, an important mediator of homeostatic sleep pressure.<sup>151</sup> Further exploration of these molecular and neurological pathways could provide greater insight into precisely how E2 is affecting sleep need and behavior.

## **E. Conclusion**

Rodents provide a model system for studying the mechanism underlying the sensitivity of the sleep circuitry and behavior to E2. Such a model is highly significant in the identification of neuronal targets for E2 within the sleep circuitry. Here, we describe the key role of E2 alone in modulating sleep behavior, as well as provide first clear evidence of a direct role for E2 in a sleep-active nucleus. The identification of the MnPN as a direct site of E2 action, showing that it is both necessary AND sufficient for induction of estrogenic effects on sleep, now allows for more mechanistic research to determine how E2 is suppressing sleep in females. Understanding the circuits that E2 can act on to regulate sleep may enable better drug development and treatment of sleep disorders in the clinical population.

## References

1. Aminoff MJ, Boller F, Swaab DF. (2011). *Handb Clin Neurol*, 98vii. DOI: 10.1016/B978-0-444-52006-7.00047-2 PMID: 2105617
2. Morgan D, Tsai SC. (2015). Sleep and the endocrine system. *Crit Care Clin*, 31(3), 403-18. DOI: 10.1016/j.ccc.2015.03.004 PMID: 26118912
3. Spiegel K, Leproult R, Van Cauter E. (1999). Impact of sleep debt on metabolic and endocrine function. *Lancet*, 354(9188), 1435-9. DOI: 10.1016/S0140-6736(99)01376-8 PMID: 10543671
4. Ohayon, MM (2002). Epidemiology of insomnia: what we know and what we still need to learn. *Sleep Med Rev* 6, 97–111.
5. Mong, JA, and Cusmano, DM (2016). Sex differences in sleep: impact of biological sex and sex steroids. *Philos Trans R Soc Lond, B, Biol Sci* 371, 20150110. DOI: 10.1098/rstb.2015.0110 PMID: 26833831
6. Mong, JA, Baker, FC, Mahoney, MM, Paul, KN, Schwartz, MD, Semba, K, and Silver, R (2011). Sleep, rhythms, and the endocrine brain: influence of sex and gonadal hormones. *J Neurosci* 31, 16107–16116.
7. Hadjimarkou, MM, Benham, R, Schwarz, JM, Holder, MK, and Mong, JA (2008). Estradiol suppresses rapid eye movement sleep and activation of sleep-active neurons in the ventrolateral preoptic area. *Eur J Neurosci* 27, 1780–1792.
8. Cusmano, DM, Hadjimarkou, MM, and Mong, JA (2014). Gonadal steroid modulation of sleep and wakefulness in male and female rats is sexually differentiated and neonatally organized by steroid exposure. *Endocrinology* 155, 204–214.
9. Acerbi A, McNamara P, Nunn CL. (2008). To sleep or not to sleep: the ecology of sleep in artificial organisms. *BMC Ecol*, 810. DOI: 10.1186/1472-6785-8-10 PMID: 18479523
10. Simasko SM, Mukherjee S. (2009). Novel analysis of sleep patterns in rats separates periods of vigilance cycling from long-duration wake events. *Behav Brain Res*, 196(2), 228-36. DOI: 10.1016/j.bbr.2008.09.003 PMID: 18835301
11. Dubowy C, Sehgal A. (2017). Circadian Rhythms and Sleep in *Drosophila melanogaster*. *Genetics*, 205(4), 1373-1397. DOI: 10.1534/genetics.115.185157 PMID: 28360128
12. Nelson, LR, and Bulun, SE (2001). Estrogen production and action. *J Am Acad Dermatol* 45, S116-124.
13. Brodie, AM (1979). Recent advances in studies on estrogen biosynthesis. *J Endocrinol Invest* 2, 445–460.

14. Wenzel, M, and Blum, KU (1967). [Determination of the oxidation of estradiol to estrone in the human organism, using estradiol-17 $\alpha$ -T]. *Z Klin Chem Klin Biochem* 5, 202–205.
15. Ostergard, DR (1973). Estriol in pregnancy. *Obstet Gynecol Surv* 28, 215–231.
16. Ali, ES, Mangold, C, and Peiris, AN (2017). Estriol: emerging clinical benefits. *Menopause* 24, 1081–1085.
17. Miller, BG (1969). The relative potencies of oestriol, oestradiol and oestrone on the uterus and vagina of the mouse. *J Endocrinol* 43, 563–570.
18. Anselmi, E, Santoro, R, and Natoli, A (1961). [The urinary elimination of estriol, estrone and 17-beta estradiol in normal adult humans]. *Prog Med (Napoli)* 17, 459–463.
19. Luine, VN (2014). Estradiol and cognitive function: past, present and future. *Horm Behav* 66, 602–618.
20. Paterni, I, Granchi, C, Katzenellenbogen, JA, and Minutolo, F (2014). Estrogen receptors alpha (ER $\alpha$ ) and beta (ER $\beta$ ): subtype-selective ligands and clinical potential. *Steroids* 90, 13–29.
21. Micevych, PE, and Kelly, MJ (2012). Membrane estrogen receptor regulation of hypothalamic function. *Neuroendocrinology* 96, 103–110.
22. Blankvoort, BM, de Groene, EM, van Meeteren-Kreikamp, AP, Witkamp, RF, Rodenburg, RJ, and Aarts, JM (2001). Development of an androgen reporter gene assay (AR-LUX) utilizing a human cell line with an endogenously regulated androgen receptor. *Anal Biochem* 298, 93–102.
23. Tuckey, RC (2005). Progesterone synthesis by the human placenta. *Placenta* 26, 273–281.
24. Lynch, WJ, and Sofuoglu, M (2010). Role of progesterone in nicotine addiction: evidence from initiation to relapse. *Exp Clin Psychopharmacol* 18, 451–461.
25. Schüssler, P et al. (2018). Sleep after intranasal progesterone vs. zolpidem and placebo in postmenopausal women - A randomized, double-blind cross over study. *Psychoneuroendocrinology* 92, 81–86.
26. Schüssler, P, Kluge, M, Yassouridis, A, Dresler, M, Held, K, Zihl, J, and Steiger, A (2008). Progesterone reduces wakefulness in sleep EEG and has no effect on cognition in healthy postmenopausal women. *Psychoneuroendocrinology* 33, 1124–1131.
27. Lancel, M, Faulhaber, J, Holsboer, F, and Rupprecht, R (1996). Progesterone induces changes in sleep comparable to those of agonistic GABAA receptor modulators. *Am J Physiol* 271, E763-772.

28. Lancel, M, Faulhaber, J, Holsboer, F, and Rupprecht, R (1999). The GABA(A) receptor antagonist picrotoxin attenuates most sleep changes induced by progesterone. *Psychopharmacology (Berl)* 141, 213–219.
29. Pietrowsky R, Meyrer R, Kern W, Born J, Fehm HL. (1994). Effects of diurnal sleep on secretion of cortisol, luteinizing hormone, and growth hormone in man. *J Clin Endocrinol Metab*, 78(3), 683-7. DOI: 10.1210/jcem.78.3.8126142 PMID: 8126142
30. Challet E. (2015). Keeping circadian time with hormones. *Diabetes Obes Metab*, 17 Suppl 176-83. DOI: 10.1111/dom.12516 PMID: 26332971
31. James FO, Walker CD, Boivin DB. (2004). Controlled exposure to light and darkness realigns the salivary cortisol rhythm in night shift workers. *Chronobiol Int*, 21(6), 961-72. PMID: 15646242
32. Miki K, Yoshimoto M. (2013). Sympathetic nerve activity during sleep, exercise, and mental stress. *Auton Neurosci*, 174(1-2), 15-20. DOI: 10.1016/j.autneu.2012.12.007 PMID: 23332904
33. Born J, Wagner U. (2004). Memory consolidation during sleep: role of cortisol feedback. *Ann N Y Acad Sci*, 1032198-201. DOI: 10.1196/annals.1314.020 PMID: 15677410
34. Späth-Schwalbe E, Gofferje M, Kern W, Born J, Fehm HL. (1991). Sleep disruption alters nocturnal ACTH and cortisol secretory patterns. *Biol Psychiatry*, 29(6), 575-84. PMID: 1647222
35. Wright KP, Drake AL, Frey DJ, Fleshner M, Desouza CA, Gronfier C et al. (2015). Influence of sleep deprivation and circadian misalignment on cortisol, inflammatory markers, and cytokine balance. *Brain Behav Immun*, 4724-34. DOI: 10.1016/j.bbi.2015.01.004 PMID: 25640603
36. Copinschi G, Leproult R, Spiegel K. (2014). The important role of sleep in metabolism. *Front Horm Res*, 4259-72. DOI: 10.1159/000358858 PMID: 24732925
37. Marchant EG, Mistlberger RE. (1997). Anticipation and entrainment to feeding time in intact and SCN-ablated C57BL/6j mice. *Brain Res*, 765(2), 273-82. PMID: 9313900
38. Perelis M, Ramsey KM, Marcheiva B, Bass J. (2016). Circadian Transcription from Beta Cell Function to Diabetes Pathophysiology. *J Biol Rhythms*, 31(4), 323-36. DOI: 10.1177/0748730416656949 PMID: 27440914
39. Carrasco-Benso MP, Rivero-Gutierrez B, Lopez-Minguez J, Anzola A, Diez-Noguera A, Madrid JA et al. (2016). Human adipose tissue expresses intrinsic circadian rhythm in insulin sensitivity. *FASEB J*, 30(9), 3117-23. DOI: 10.1096/fj.201600269RR PMID: 27256623

40. Donga E, van Dijk M, van Dijk JG, Biermasz NR, Lammers GJ, van Kralingen KW et al. (2010). A single night of partial sleep deprivation induces insulin resistance in multiple metabolic pathways in healthy subjects. *J Clin Endocrinol Metab*, 95(6), 2963-8. DOI: 10.1210/jc.2009-2430 PMID: 20371664
41. Steyn FJ, Ngo ST. (2017). Endocrine rhythms of growth hormone release: Insights from animal studies. *Best Pract Res Clin Endocrinol Metab*, 31(6), 521-533. DOI: 10.1016/j.beem.2017.10.009 PMID: 29224665
42. Van Cauter E, Plat L. (1996). Physiology of growth hormone secretion during sleep. *J Pediatr*, 128(5 Pt 2), S32-7. PMID: 8627466
43. Ramírez DA, Vieyra E, González AI, Morán C, Domínguez R, Morales-Ledesma L. (2017). Both the Suprachiasmatic Nucleus and the Superior Ovarian Nerve Contribute to the Processes of Ovulation and Steroid Hormone Secretion on Proestrus. *Reprod Sci*, 24(6), 844-855. DOI: 10.1177/1933719116670307 PMID: 27688242
44. Nurminen T. (1998). Shift work and reproductive health. *Scand J Work Environ Health*, 24 Suppl 328-34. PMID: 9916814
45. Van Melick MJ, Van Beukering MD, Mol BW, Frings-Dresen MH, Hulshof CT. (2014). Shift work, long working hours and preterm birth: a systematic review and meta-analysis. *Int Arch Occup Environ Health*, 87(8), 835-49. DOI: 10.1007/s00420-014-0934-9 PMID: 24584887
46. Wittert G. (2014). The relationship between sleep disorders and testosterone in men. *Asian J Androl*, 16(2), 262-5. DOI: 10.4103/1008-682X.122586 PMID: 24435056
47. Bedrosian TA, Herring KL, Walton JC, Fonken LK, Weil ZM, Nelson RJ. (2013). Evidence for feedback control of pineal melatonin secretion. *Neurosci Lett*, 542123-5. DOI: 10.1016/j.neulet.2013.03.021 PMID: 23528860
48. Auld F, Maschauer EL, Morrison I, Skene DJ, Riha RL. (2017). Evidence for the efficacy of melatonin in the treatment of primary adult sleep disorders. *Sleep Med Rev*, 3410-22. DOI: 10.1016/j.smrv.2016.06.005 PMID: 28648359
49. Zhdanova, IV, Wang, SY, Leclair, OU, and Danilova, NP (2001). Melatonin promotes sleep-like state in zebrafish. *Brain Res* 903, 263–268.
50. Azeez IA, Del gallo F, Cristino L, Bentivoglio M. Daily Fluctuation of Orexin Neuron Activity and Wiring: The Challenge of "Chronoconnectivity". *Front Pharmacol*. 2018;9:1061.
51. Gandhi AV, Mosser EA, Oikonomou G, Prober DA. Melatonin is required for the circadian regulation of sleep. *Neuron*. 2015;85(6):1193-9.



52. Dijk DJ, Cajochen C. (1997). Melatonin and the circadian regulation of sleep initiation, consolidation, structure, and the sleep EEG. *J Biol Rhythms*, 12(6), 627-35. DOI: 10.1177/074873049701200618 PMID: 9406038
53. Held K, Antonijevic I, Murck H, Künzel H, Steiger A. (2005). Alpha-helical CRH exerts CRH agonistic effects on sleep-endocrine activity in humans. *Neuropsychobiology*, 52(2), 62-7. DOI: 10.1159/000086606 PMID: 15990457
54. Chang FC, Opp MR. (1999). Pituitary CRH receptor blockade reduces waking in the rat. *Physiol Behav*, 67(5), 691-6. PMID: 10604839
55. D'Aurea C, Poyares D, Piovezan RD, Passos G, Tufik S, Mello MT. (2015). Objective short sleep duration is associated with the activity of the hypothalamic-pituitary-adrenal axis in insomnia. *Arq Neuropsiquiatr*, 73(6), 516-9. DOI: 10.1590/0004-282X20150053 PMID: 26083888
56. Santiago JR, Nollado MS, Kinzler W, Santiago TV. Sleep and sleep disorders in pregnancy. *Ann Intern Med*. 2001;134(5):396-408.
57. Steiger A. (2002). Sleep and the hypothalamo-pituitary-adrenocortical system. *Sleep Med Rev*, 6(2), 125-38. PMID: 12531148
58. Bixler EO, Papaliaga MN, Vgontzas AN, Lin HM, Pejovic S, Karataraki M et al. (2009). Women sleep objectively better than men and the sleep of young women is more resilient to external stressors: effects of age and menopause. *J Sleep Res*, 18(2), 221-8. DOI: 10.1111/j.1365-2869.2008.00713.x PMID: 19302341
59. Goel N, Kim H, Lao RP. (2005). Gender differences in polysomnographic sleep in young healthy sleepers. *Chronobiol Int*, 22(5), 905-15. DOI: 10.1080/07420520500263235 PMID: 16298775
60. Redline S, Kirchner HL, Quan SF, Gottlieb DJ, Kapur V, Newman A. (2004). The effects of age, sex, ethnicity, and sleep-disordered breathing on sleep architecture. *Arch Intern Med*, 164(4), 406-18. DOI: 10.1001/archinte.164.4.406 PMID: 14980992
61. Berger K, Luedemann J, Trenkwalder C, John U, Kessler C. (2004). Sex and the risk of restless legs syndrome in the general population. *Arch Intern Med*, 164(2), 196-202. DOI: 10.1001/archinte.164.2.196 PMID: 14744844
62. Goldstein-Piekarski AN, Greer SM, Saletin JM, Harvey AG, Williams LM, Walker MP. (2018). Sex, Sleep Deprivation, and the Anxious Brain. *J Cogn Neurosci*, 30(4), 565-578. DOI: 10.1162/jocn\_a\_01225 PMID: 29244642
63. Johnson EO, Roth T, Schultz L, Breslau N. (2006). Epidemiology of DSM-IV insomnia in adolescence: lifetime prevalence, chronicity, and an emergent gender difference. *Pediatrics*, 117(2), e247-56. DOI: 10.1542/peds.2004-2629 PMID: 16452333



64. Eastman CI, Tomaka VA, Crowley SJ. (2017). Sex and ancestry determine the free-running circadian period. *J Sleep Res*, 26(5), 547-550. DOI: 10.1111/jsr.12521 PMID: 28332253
65. Cain SW, Dennison CF, Zeitzer JM, Guzik AM, Khalsa SB, Santhi N et al. (2010). Sex differences in phase angle of entrainment and melatonin amplitude in humans. *J Biol Rhythms*, 25(4), 288-96. DOI: 10.1177/0748730410374943 PMID: 20679498
66. Baker FC, Lee KA. (2018). Menstrual Cycle Effects on Sleep. *Sleep Med Clin*, 13(3), 283-294. DOI: 10.1016/j.jsmc.2018.04.002 PMID: 30098748
67. De Zambotti M, Willoughby AR, Sassoon SA, Colrain IM, Baker FC. (2015). Menstrual Cycle-Related Variation in Physiological Sleep in Women in the Early Menopausal Transition. *J Clin Endocrinol Metab*, 100(8), 2918-26. DOI: 10.1210/jc.2015-1844 PMID: 26079775
68. Frieboes RM, Murck H, Stalla GK, Antonijevic IA, Steiger A. (1998). Enhanced slow wave sleep in patients with prolactinoma. *J Clin Endocrinol Metab*, 83(8), 2706-10. DOI: 10.1210/jcem.83.8.5016 PMID: 9709935
69. Baker FC, Mitchell D, Driver HS. (2001). Oral contraceptives alter sleep and raise body temperature in young women. *Pflugers Arch*, 442(5), 729-37. PMID: 11512029
70. Burdick RS, Hoffmann R, Armitage R. (2002). Short note: oral contraceptives and sleep in depressed and healthy women. *Sleep*, 25(3), 347-9. PMID: 12003166
71. Bazalakova, M (2017). Sleep Disorders in Pregnancy. *Semin Neurol* 37, 661–668.
72. Kravitz HM, Ganz PA, Bromberger J, Powell LH, Sutton-Tyrrell K, Meyer PM. Sleep difficulty in women at midlife: a community survey of sleep and the menopausal transition. *Menopause* 2003;10:19-28.
73. Baker, FC, Lampio, L, Saaresranta, T, and Polo-Kantola, P (2018). Sleep and Sleep Disorders in the Menopausal Transition. *Sleep Med Clin* 13, 443–456.
74. Polo-Kantola P, Erkkola R, Irjala K, Helenius H, Pullinen S, Polo O. Climacteric symptoms and sleep quality. *Obstetrics and gynecology* 1999;94:219-24.
75. Cintron D, Lipford M, Larrea-Mantilla L, Spencer-Bonilla G, Lloyd R, Gionfriddo MR et al. (2017). Efficacy of menopausal hormone therapy on sleep quality: systematic review and meta-analysis. *Endocrine*, 55(3), 702-711. DOI: 10.1007/s12020-016-1072-9 PMID: 27515805
76. Paul KN, Dugovic C, Turek FW, Laposky AD. (2006). Diurnal sex differences in the sleep-wake cycle of mice are dependent on gonadal function. *Sleep*, 29(9), 1211-23. PMID: 17040009

77. Koehl M, Battle S, Meerlo P. (2006). Sex differences in sleep: the response to sleep deprivation and restraint stress in mice. *Sleep*, 29(9), 1224-31. PMID: 17040010
78. Clark, JH, Anderson, J, and Peck, EJ (1972). Receptor-estrogen complex in the nuclear fraction of rat uterine cells during the estrous cycle. *Science* 176, 528–530.
79. Schwierin B, Borbély AA, Tobler I. (1998). Sleep homeostasis in the female rat during the estrous cycle. *Brain Res*, 811(1-2), 96-104. PMID: 9804908
80. Schwartz MD, Mong JA. (2013). Estradiol modulates recovery of REM sleep in a time-of-day-dependent manner. *Am J Physiol Regul Integr Comp Physiol*, 305(3), R271-80. DOI: 10.1152/ajpregu.00474.2012 PMID: 23678032
81. Vyazovskiy VV, Kopp C, Wigger E, Jones ME, Simpson ER, Tobler I. (2006). Sleep and rest regulation in young and old oestrogen-deficient female mice. *J Neuroendocrinol*, 18(8), 567-76. DOI: 10.1111/j.1365-2826.2006.01452.x PMID: 16867177
82. Nugent BM, Wright CL, Shetty AC, Hodes GE, Lenz KM, Mahurkar A et al. (2015). Brain feminization requires active repression of masculinization via DNA methylation. *Nat Neurosci*, 18(5), 690-7. DOI: 10.1038/nn.3988 PMID: 25821913
83. Sato T, Matsumoto T, Kawano H, Watanabe T, Uematsu Y, Sekine K et al. (2004). Brain masculinization requires androgen receptor function. *Proc Natl Acad Sci U S A*, 101(6), 1673-8. DOI: 10.1073/pnas.0305303101 PMID: 14747651
84. Saper, CB, Fuller, PM, Pedersen, NP, Lu, J, and Scammell, TE (2010). Sleep state switching. *Neuron* 68, 1023–1042.
85. Rønnekleiv OK, Kelly MJ. (2005). Diversity of ovarian steroid signaling in the hypothalamus. *Front Neuroendocrinol*, 26(2), 65-84. DOI: 10.1016/j.yfrne.2005.05.001 PMID: 16009409
86. Donahue JE, Stopa EG, Chorsky RL, King JC, Schipper HM, Tobet SA et al. (2000). Cells containing immunoreactive estrogen receptor-alpha in the human basal forebrain. *Brain Res*, 856(1-2), 142-51. PMID: 10677621
87. Mong JA, Devidze N, Frail DE, O'Connor LT, Samuel M, Choleris E et al. (2003). Estradiol differentially regulates lipocalin-type prostaglandin D synthase transcript levels in the rodent brain: Evidence from high-density oligonucleotide arrays and in situ hybridization. *Proc Natl Acad Sci U S A*, 100(1), 318-23. DOI: 10.1073/pnas.262663799 PMID: 12518068
88. Devidze N, Fujimori K, Urade Y, Pfaff DW, Mong JA. (2010). Estradiol regulation of lipocalin-type prostaglandin D synthase promoter activity: evidence for direct and indirect mechanisms. *Neurosci Lett*, 474(1), 17-21. DOI: 10.1016/j.neulet.2010.02.064 PMID: 20193744

89. Ribeiro AC, Pfaff DW, Devidze N. (2009). Estradiol modulates behavioral arousal and induces changes in gene expression profiles in brain regions involved in the control of vigilance. *Eur J Neurosci*, 29(4), 795-801. DOI: 10.1111/j.1460-9568.2009.06620.x PMID: 19200066
90. Bailey M, Silver R. (2014). Sex differences in circadian timing systems: implications for disease. *Front Neuroendocrinol*, 35(1), 111-39. DOI: 10.1016/j.yfrne.2013.11.003 PMID: 24287074
91. Vida B, Hrabovszky E, Kalamatianos T, Coen CW, Liposits Z, Kalló I. (2008). Oestrogen receptor alpha and beta immunoreactive cells in the suprachiasmatic nucleus of mice: distribution, sex differences and regulation by gonadal hormones. *J Neuroendocrinol*, 20(11), 1270-7. DOI: 10.1111/j.1365-2826.2008.01787.x PMID: 18752649
92. Karatsoreos IN, Butler MP, Lesauter J, Silver R. (2011). Androgens modulate structure and function of the suprachiasmatic nucleus brain clock. *Endocrinology*, 152(5), 1970-8. DOI: 10.1210/en.2010-1398 PMID: 21363939
93. Model Z, Butler MP, LeSauter J, Silver R. (2015). Suprachiasmatic nucleus as the site of androgen action on circadian rhythms. *Horm Behav*, 731-7. DOI: 10.1016/j.yhbeh.2015.05.007 PMID: 26012711
94. Ehlen JC, Hesse S, Pinckney L, Paul KN. (2013). Sex chromosomes regulate nighttime sleep propensity during recovery from sleep loss in mice. *PLoS One*, 8(5), e62205. DOI: 10.1371/journal.pone.0062205 PMID: 23658713
95. Arnold AP. (2004). Sex chromosomes and brain gender. *Nat Rev Neurosci*, 5(9), 701-8. DOI: 10.1038/nrn1494 PMID: 15322528
96. Xie L, Kang H, Xu Q, Chen MJ, Liao Y, Thiyagarajan M et al. (2013). Sleep drives metabolite clearance from the adult brain. *Science*, 342(6156), 373-7. DOI: 10.1126/science.1241224 PMID: 24136970
97. Plog BA, Nedergaard M. (2018). The Glymphatic System in Central Nervous System Health and Disease: Past, Present, and Future. *Annu Rev Pathol*, 13379-394. DOI: 10.1146/annurev-pathol-051217-111018 PMID: 29195051
98. Cellini N. (2017). Memory consolidation in sleep disorders. *Sleep Med Rev*, 35101-112. DOI: 10.1016/j.smr.2016.09.003 PMID: 27765468
99. Krause AJ, Simon EB, Mander BA, Greer SM, Saletin JM, Goldstein-Piekarski AN et al. (2017). The sleep-deprived human brain. *Nat Rev Neurosci*, 18(7), 404-418. DOI: 10.1038/nrn.2017.55 PMID: 28515433
100. Ackermann S, Rasch B. (2014). Differential effects of non-REM and REM sleep on memory consolidation? *Curr Neurol Neurosci Rep*, 14(2), 430. DOI: 10.1007/s11910-013-0430-8 PMID: 24395522

101. Raven F, Van der Zee EA, Meerlo P, Havekes R. (2018). The role of sleep in regulating structural plasticity and synaptic strength: Implications for memory and cognitive function. *Sleep Med Rev*, 393-11. DOI: 10.1016/j.smrv.2017.05.002 PMID: 28641933
102. Fraser R, Nordin BE. (1955). The basal metabolic rate during sleep. *Lancet*, 268(6863), 532-3. PMID: 14354919
103. Villafuerte G, Miguel-Puga A, Rodríguez EM, Machado S, Manjarrez E, Arias-Carrión O. (2015). Sleep deprivation and oxidative stress in animal models: a systematic review. *Oxid Med Cell Longev*, 2015234952. DOI: 10.1155/2015/234952 PMID: 25945148
104. Rasmussen MH, Wildschjødzt G, Juul A, Hilsted J. (2008). Polysomnographic sleep, growth hormone insulin-like growth factor-I axis, leptin, and weight loss. *Obesity (Silver Spring)*, 16(7), 1516-21. DOI: 10.1038/oby.2008.249 PMID: 18464752
105. Lanquart JP, Nardone P, Hubain P, Loas G, Linkowski P. (2018). The dichotomy between low frequency and delta waves in human sleep: A reappraisal. *J Neurosci Methods*, 293234-246. DOI: 10.1016/j.jneumeth.2017.09.019 PMID: 28982607
106. Moser D, Anderer P, Gruber G, Parapatics S, Loretz E, Boeck M et al. (2009). Sleep classification according to AASM and Rechtschaffen & Kales: effects on sleep scoring parameters. *Sleep*, 32(2), 139-49. PMID: 19238800
107. Hutchison IC, Rathore S. (2015). The role of REM sleep theta activity in emotional memory. *Front Psychol*, 61439. DOI: 10.3389/fpsyg.2015.01439 PMID: 26483709
108. Aalto J, Kiianmaa K. (1984). Increased voluntary alcohol drinking concurrent with REM-sleep deprivation. *Alcohol*, 1(1), 77-9. PMID: 6543613
109. Greene, RW, and Frank, MG (2010). Slow wave activity during sleep: functional and therapeutic implications. *Neuroscientist* 16, 618–633.
110. Swift, KM, Keus, K, Echeverria, CG, Cabrera, Y, Jimenez, J, Holloway, J, Clawson, BC, and Poe, GR (2020). Sex differences within sleep in gonadally intact rats. *Sleep* 43.
111. Borgus, JR, Puthongkham, P, and Venton, BJ (2020). Complex sex and estrous cycle differences in spontaneous transient adenosine. *J Neurochem* 153, 216–229.
112. Eban-Rothschild A, Giardino WJ, de Lecea L. (2017). To sleep or not to sleep: neuronal and ecological insights. *Curr Opin Neurobiol*, 44132-138. DOI: 10.1016/j.conb.2017.04.010 PMID: 28500869
113. Abbott SM, Reid KJ, Zee PC. (2015). Circadian Rhythm Sleep-Wake Disorders. *Psychiatr Clin North Am*, 38(4), 805-23. DOI: 10.1016/j.psc.2015.07.012 PMID: 26600110

114. Mouret J, Coindet J, Debilly G, Chouvet G. (1978). Suprachiasmatic nuclei lesions in the rat: alterations in sleep circadian rhythms. *Electroencephalogr Clin Neurophysiol*, 45(3), 402-8. PMID: 79478
115. Sawaki Y, Nihonmatsu I, Kawamura H. (1984). Transplantation of the neonatal suprachiasmatic nuclei into rats with complete bilateral suprachiasmatic lesions. *Neurosci Res*, 1(1), 67-72. PMID: 6536887
116. Cassone, VM, Chesworth, MJ, and Armstrong, SM (1986). Entrainment of rat circadian rhythms by daily injection of melatonin depends upon the hypothalamic suprachiasmatic nuclei. *Physiol Behav* 36, 1111–1121.
117. Berson, DM, Dunn, FA, and Takao, M (2002). Phototransduction by retinal ganglion cells that set the circadian clock. *Science* 295, 1070–1073.
118. Squarcini CF, Pires ML, Lopes C, Benedito-Silva AA, Esteves AM, Cornelissen-Guillaume G et al. (2013). Free-running circadian rhythms of muscle strength, reaction time, and body temperature in totally blind people. *Eur J Appl Physiol*, 113(1), 157-65. DOI: 10.1007/s00421-012-2415-8 PMID: 22618303
119. Aryal RP, Kwak PB, Tamayo AG, Gebert M, Chiu PL, Walz T et al. (2017). Macromolecular Assemblies of the Mammalian Circadian Clock. *Mol Cell*, 67(5), 770-782.e6. DOI: 10.1016/j.molcel.2017.07.017 PMID: 28886335
120. Golombek DA, Rosenstein RE. (2010). Physiology of circadian entrainment. *Physiol Rev*, 90(3), 1063-102. DOI: 10.1152/physrev.00009.2009 PMID: 20664079
121. Shinohara K, Honma S, Katsuno Y, Abe H, Honma K. (1998). Circadian release of amino acids in the suprachiasmatic nucleus in vitro. *Neuroreport*, 9(1), 137-40. PMID: 9592063
122. Sack RL, Brandes RW, Kendall AR, Lewy AJ. Entrainment of free-running circadian rhythms by melatonin in blind people. *N Engl J Med*. 2000;343(15):1070-7.
123. Morgan PJ, Barrett P, Howell HE, Helliwell R. (1994). Melatonin receptors: localization, molecular pharmacology and physiological significance. *Neurochem Int*, 24(2), 101-46. PMID: 8161940
124. Allada R, Cirelli C, Sehgal A. (2017). Molecular Mechanisms of Sleep Homeostasis in Flies and Mammals. *Cold Spring Harb Perspect Biol*, 9(8), DOI: 10.1101/cshperspect.a027730 PMID: 28432135
125. Donlea JM. (2017). Neuronal and molecular mechanisms of sleep homeostasis. *Curr Opin Insect Sci*, 2451-57. DOI: 10.1016/j.cois.2017.09.008 PMID: 29208223
126. Greene R, Siegel J. (2004). Sleep: a functional enigma. *Neuromolecular Med*, 5(1), 59-68. DOI: 10.1385/NMM:5:1:059 PMID: 15001813

127. Reichert CF, Maire M, Schmidt C, Cajochen C. (2016). Sleep-Wake Regulation and Its Impact on Working Memory Performance: The Role of Adenosine. *Biology (Basel)*, 5(1), DOI: 10.3390/biology5010011 PMID: 26861410
128. Zeitzer JM, Morales-Villagran A, Maidment NT, Behnke EJ, Ackerson LC, Lopez-Rodriguez F et al. (2006). Extracellular adenosine in the human brain during sleep and sleep deprivation: an in vivo microdialysis study. *Sleep*, 29(4), 455-61. PMID: 16676778
129. Alam MA, Kumar S, McGinty D, Alam MN, Szymusiak R. (2014). Neuronal activity in the preoptic hypothalamus during sleep deprivation and recovery sleep. *J Neurophysiol*, 111(2), 287-99. DOI: 10.1152/jn.00504.2013 PMID: 24174649
130. Wagner DR. (1999). Circadian Rhythm Sleep Disorders. *Curr Treat Options Neurol*, 1(4), 299-308. PMID: 11096717
131. Lazarus M, Chen JF, Huang ZL, Urade Y, Fredholm BB. (2017). Adenosine and Sleep. *Handb Exp Pharmacol*, DOI: 10.1007/164\_2017\_36 PMID: 28646346
132. Huang ZL, Zhang Z, Qu WM. (2014). Roles of adenosine and its receptors in sleep-wake regulation. *Int Rev Neurobiol*, 119349-71. DOI: 10.1016/B978-0-12-801022-8.00014-3 PMID: 25175972
133. Zhang BJ, Huang ZL, Chen JF, Urade Y, Qu WM. (2017). Adenosine A2A receptor deficiency attenuates the somnogenic effect of prostaglandin D2 in mice. *Acta Pharmacol Sin*, 38(4), 469-476. DOI: 10.1038/aps.2016.140 PMID: 28112177
134. Obal F, Opp M, Cady AB, Johannsen L, Postlethwaite AE, Poppleton HM et al. (1990). Interleukin 1 alpha and an interleukin 1 beta fragment are somnogenic. *Am J Physiol*, 259(3 Pt 2), R439-46. DOI: 10.1152/ajpregu.1990.259.3.R439 PMID: 2396703
135. Kapás L, Hong L, Cady AB, Opp MR, Postlethwaite AE, Seyer JM et al. (1992). Somnogenic, pyrogenic, and anorectic activities of tumor necrosis factor-alpha and TNF-alpha fragments. *Am J Physiol*, 263(3 Pt 2), R708-15. DOI: 10.1152/ajpregu.1992.263.3.R708 PMID: 1357984
136. Wang Z, Ma J, Miyoshi C, Li Y, Sato M, Ogawa Y et al. (2018). Quantitative phosphoproteomic analysis of the molecular substrates of sleep need. *Nature*, 558(7710), 435-439. DOI: 10.1038/s41586-018-0218-8 PMID: 29899451
137. Honda T, Fujiyama T, Miyoshi C, Ikkyu A, Hotta-Hirashima N, Kanno S et al. (2018). A single phosphorylation site of SIK3 regulates daily sleep amounts and sleep need in mice. *Proc Natl Acad Sci U S A*, 115(41), 10458-10463. DOI: 10.1073/pnas.1810823115 PMID: 30254177
138. Stenberg D. (2007). Neuroanatomy and neurochemistry of sleep. *Cell Mol Life Sci*, 64(10), 1187-204. DOI: 10.1007/s00018-007-6530-3 PMID: 17364141



139. Takahashi, JS, Hamm, H, and Menaker, M (1980). Circadian rhythms of melatonin release from individual superfused chicken pineal glands in vitro. *Proc Natl Acad Sci USA* 77, 2319–2322.
140. Borbély, AA (2001). From slow waves to sleep homeostasis: new perspectives. *Arch Ital Biol* 139, 53–61.
141. Yanik G, Glaum S, Radulovacki M. (1987). The dose-response effects of caffeine on sleep in rats. *Brain Res*, 403(1), 177-80. PMID: 3828812
142. Sala-Newby, GB, Skladanowski, AC, and Newby, AC (1999). The mechanism of adenosine formation in cells. Cloning of cytosolic 5'-nucleotidase-I. *J Biol Chem* 274, 17789–17793.
143. Meng, F et al. (2019). CD73-derived adenosine controls inflammation and neurodegeneration by modulating dopamine signalling. *Brain* 142, 700–718.
144. Boison, D (2013). Adenosine kinase: exploitation for therapeutic gain. *Pharmacol Rev* 65, 906–943.
145. Bagheri, S, Saboury, AA, and Haertlé, T (2019). Adenosine deaminase inhibition. *Int J Biol Macromol* 141, 1246–1257.
146. Poulton, JE, and Butt, VS (1975). Purification and properties of S-adenosyl-L-methionine: caffeic acid O-methyltransferase from leaves of spinach beet (*Beta vulgaris* L). *Biochim Biophys Acta* 403, 301–314.
147. Jackson, EK, Kotermanski, SE, Menshikova, EV, Dubey, RK, Jackson, TC, and Kochanek, PM (2017). Adenosine production by brain cells. *J Neurochem* 141, 676–693.
148. Mitrović, N, Zarić, M, Drakulić, D, Martinović, J, Stanojlović, M, Sévigny, J, Horvat, A, Nedeljković, N, and Grković, I (2016). 17 $\beta$ -Estradiol upregulates ecto-5'-nucleotidase (CD73) in hippocampal synaptosomes of female rats through action mediated by estrogen receptor- $\alpha$  and - $\beta$ . *Neuroscience* 324, 286–296.
149. Blanco-Centurion C, Xu M, Murillo-Rodriguez E, Gerashchenko D, Shiromani AM, Salin-Pascual RJ et al. (2006). Adenosine and sleep homeostasis in the Basal forebrain. *J Neurosci*, 26(31), 8092-100. DOI: 10.1523/JNEUROSCI.2181-06.2006 PMID: 16885223
150. Arrigoni, E, Chamberlin, NL, Saper, CB, and McCarley, RW (2006). Adenosine inhibits basal forebrain cholinergic and noncholinergic neurons in vitro. *Neuroscience* 140, 403–413.
151. Kumar S, Rai S, Hsieh KC, McGinty D, Alam MN, Szymusiak R. (2013). Adenosine A(2A) receptors regulate the activity of sleep regulatory GABAergic neurons in the preoptic hypothalamus. *Am J Physiol Regul Integr Comp Physiol*, 305(1), R31-41. DOI: 10.1152/ajpregu.00402.2012 PMID: 23637137

152. Methippara MM, Kumar S, Alam MN, Szymusiak R, McGinty D. (2005). Effects on sleep of microdialysis of adenosine A1 and A2a receptor analogs into the lateral preoptic area of rats. *Am J Physiol Regul Integr Comp Physiol*, 289(6), R1715-23. DOI: 10.1152/ajpregu.00247.2005 PMID: 16109808
153. Borea, PA, Gessi, S, Merighi, S, Vincenzi, F, and Varani, K (2018). Pharmacology of Adenosine Receptors: The State of the Art. *Physiol Rev* 98, 1591–1625.
154. Stockwell, J, Jakova, E, and Cayabyab, FS (2017). Adenosine A1 and A2A Receptors in the Brain: Current Research and Their Role in Neurodegeneration. *Molecules* 22.
155. Huang, Z-L, Urade, Y, and Hayaishi, O (2011). The role of adenosine in the regulation of sleep. *Curr Top Med Chem* 11, 1047–1057.
156. Greene, RW, Bjorness, TE, and Suzuki, A (2017). The adenosine-mediated, neuronal-glial, homeostatic sleep response. *Curr Opin Neurobiol* 44, 236–242.
157. Saper CB, Fuller PM. Wake-sleep circuitry: an overview. *Curr Opin Neurobiol*. 2017;44:186-192.
158. Fuller PM, Fuller P, Sherman D, Pedersen NP, Saper CB, Lu J. Reassessment of the structural basis of the ascending arousal system. *J Comp Neurol*. 2011;519(5):933-56.
159. Gvilia, I (2010). Underlying brain mechanisms that regulate sleep-wakefulness cycles. *Int Rev Neurobiol* 93, 1–21.
160. Szymusiak, R. & McGinty, D. Hypothalamic regulation of sleep and arousal. *Ann N Y Acad Sci* 1129, 275-286, doi:10.1196/annals.1417.027 (2008).
161. Deurveilher S, Semba K. (2003). Indirect projections from the suprachiasmatic nucleus to the median preoptic nucleus in rat. *Brain Res*, 987(1), 100-6. PMID: 14499951
162. Sun X, Whitefield S, Rusak B, Semba K. (2001). Electrophysiological analysis of suprachiasmatic nucleus projections to the ventrolateral preoptic area in the rat. *Eur J Neurosci*, 14(8), 1257-74. PMID: 11703455
163. Fulcher BD, Phillips AJ, Postnova S, Robinson PA. (2014). A physiologically based model of orexinergic stabilization of sleep and wake. *PLoS One*, 9(3), e91982. DOI: 10.1371/journal.pone.0091982 PMID: 24651580
164. Ocampo-Garcés A, Ibáñez F, Perdomo G, Torrealba F. (2011). Orexin-B-saporin lesions in the lateral hypothalamus enhance photic masking of rapid eye movement sleep in the albino rat. *J Sleep Res*, 20(1 Pt 1), 3-11. DOI: 10.1111/j.1365-2869.2010.00864.x PMID: 20626614
165. Grafe LA, Bhatnagar S. Orexins and stress. *Front Neuroendocrinol*. 2018;51:132-145.



166. Uschakov A, Gong H, McGinty D, Szymusiak R. Efferent projections from the median preoptic nucleus to sleep- and arousal-regulatory nuclei in the rat brain. *Neuroscience* 2007;150:104-20.
167. Suntsova N, Guzman-Marin R, Kumar S, Alam MN, Szymusiak R, McGinty D. The median preoptic nucleus reciprocally modulates activity of arousal-related and sleep-related neurons in the perifornical lateral hypothalamus. *The Journal of neuroscience: the official journal of the Society for Neuroscience* 2007;27:1616-30.
168. Chou TC, Bjorkum AA, Gaus SE, Lu J, Scammell TE, Saper CB. Afferents to the ventrolateral preoptic nucleus. *The Journal of neuroscience: the official journal of the Society for Neuroscience* 2002;22:977-90.
169. Suntsova, N., Szymusiak, R., Alam, M. N., Guzman-Marin, R. & McGinty, D. Sleep-waking discharge patterns of median preoptic nucleus neurons in rats. *The Journal of physiology* 543, 665-677 (2002).
170. Uschakov, A., McGinty, D., Szymusiak, R. & McKinley, M. J. Functional correlates of activity in neurons projecting from the lamina terminalis to the ventrolateral periaqueductal gray. *The European journal of neuroscience* 30, 2347-2355, doi:10.1111/j.1460-9568.2009.07024.x (2009).
171. Kumar, S. et al. Inactivation of median preoptic nucleus causes c-Fos expression in hypocretin- and serotonin-containing neurons in anesthetized rat. *Brain research* 1234, 66-77, doi:10.1016/j.brainres.2008.07.115 (2008).
172. Gvilia, I., Turner, A., McGinty, D. & Szymusiak, R. Preoptic area neurons and the homeostatic regulation of rapid eye movement sleep. *The Journal of neuroscience: the official journal of the Society for Neuroscience* 26, 3037-3044, doi:10.1523/JNEUROSCI.4827-05.2006 (2006).
173. Greenblatt DJ, Harmatz JS, Singh NN, Steinberg F, Roth T, Moline ML et al. (2014). Gender differences in pharmacokinetics and pharmacodynamics of zolpidem following sublingual administration. *J Clin Pharmacol*, 54(3), 282-90. DOI: 10.1002/jcph.220 PMID: 24203450
174. Giménez S, Romero S, Gich I, Clos S, Grasa E, Antonijoan RM et al. (2011). Sex differences in sleep after a single oral morning dose of olanzapine in healthy volunteers. *Hum Psychopharmacol*, 26(7), 498-507. DOI: 10.1002/hup.1232 PMID: 21953682
175. Gamaldo CE, Earley CJ. (2006). Restless legs syndrome: a clinical update. *Chest*, 130(5), 1596-604. DOI: 10.1378/chest.130.5.1596 PMID: 17099042
176. Trotti LM, Becker LA. (2019). Iron for the treatment of restless legs syndrome. *Cochrane Database Syst Rev*, 1CD007834. DOI: 10.1002/14651858.CD007834.pub3 PMID: 30609006

177. White DP. (2017). Advanced Concepts in the Pathophysiology of Obstructive Sleep Apnea. *Adv Otorhinolaryngol*, 807-16. DOI: 10.1159/000470522 PMID: 28738382
178. Punjabi NM. (2008). The epidemiology of adult obstructive sleep apnea. *Proc Am Thorac Soc*, 5(2), 136-43. DOI: 10.1513/pats.200709-155MG PMID: 18250205
179. Schwab RJ, Kim C, Bagchi S, Keenan BT, Comyn FL, Wang S et al. (2015). Understanding the anatomic basis for obstructive sleep apnea syndrome in adolescents. *Am J Respir Crit Care Med*, 191(11), 1295-309. DOI: 10.1164/rccm.201501-0169OC PMID: 25835282
180. Bratton DJ, Gaisl T, Wons AM, Kohler M. (2015). CPAP vs Mandibular Advancement Devices and Blood Pressure in Patients With Obstructive Sleep Apnea: A Systematic Review and Meta-analysis. *JAMA*, 314(21), 2280-93. DOI: 10.1001/jama.2015.16303 PMID: 26624827
181. Pavlova M. (2017). Circadian Rhythm Sleep-Wake Disorders. *Continuum (Minneapolis)*, 23(4, Sleep Neurology), 1051-1063. DOI: 10.1212/CON.0000000000000499 PMID: 28777176
182. Matheson E, Hainer BL. Insomnia: Pharmacologic Therapy. *Am Fam Physician*. 2017;96(1):29-35.
183. Kayaba M, Sasai-sakuma T, Inoue Y. Clinical significance of social jetlag in patients with excessive daytime sleepiness. *Chronobiol Int*. 2018;35(12):1637-1646.
184. Danielsson K, Markström A, Broman JE, von Knorring L, Jansson-Fröjmark M. (2016). Delayed sleep phase disorder in a Swedish cohort of adolescents and young adults: Prevalence and associated factors. *Chronobiol Int*, 33(10), 1331-1339. DOI: 10.1080/07420528.2016.1217002 PMID: 27537980
185. Micic G, Lovato N, Gradisar M, Ferguson SA, Burgess HJ, Lack LC. (2016). The etiology of delayed sleep phase disorder. *Sleep Med Rev*, 2729-38. DOI: 10.1016/j.smrv.2015.06.004 PMID: 26434674
186. Wirz-Justice A. (2018). Seasonality in affective disorders. *Gen Comp Endocrinol*, 258244-249. DOI: 10.1016/j.ygcen.2017.07.010 PMID: 28711512
187. Hickie IB, Rogers NL. (2011). Novel melatonin-based therapies: potential advances in the treatment of major depression. *Lancet*, 378(9791), 621-31. DOI: 10.1016/S0140-6736(11)60095-0 PMID: 21596429
188. Peter-Derex L, Yammine P, Bastuji H, Croisile B. (2015). Sleep and Alzheimer's disease. *Sleep Med Rev*, 1929-38. DOI: 10.1016/j.smrv.2014.03.007 PMID: 24846773
189. Pase MP, Himali JJ, Grima NA, Beiser AS, Satizabal CL, Aparicio HJ et al. (2017). Sleep architecture and the risk of incident dementia in the community. *Neurology*, 89(12), 1244-1250. DOI: 10.1212/WNL.0000000000004373 PMID: 28835407

190. Macedo AC, Balouch S, Tabet N. (2017). Is Sleep Disruption a Risk Factor for Alzheimer's Disease? *J Alzheimers Dis*, 58(4), 993-1002. DOI: 10.3233/JAD-161287 PMID: 28550253
191. Lucey BP, Bateman RJ. (2014). Amyloid- $\beta$  diurnal pattern: possible role of sleep in Alzheimer 'disease' pathogenesis. *Neurobiol Aging*, 35 Suppl 2S29-34. DOI: 10.1016/j.neurobiolaging.2014.03.035 PMID: 24910393
192. Schmid SM, Hallschmid M, Schultes B. (2015). The metabolic burden of sleep loss. *Lancet Diabetes Endocrinol*, 3(1), 52-62. DOI: 10.1016/S2213-8587(14)70012-9 PMID: 24731536
193. Schlaich M, Straznicki N, Lambert E, Lambert G. (2015). Metabolic syndrome: a sympathetic disease? *Lancet Diabetes Endocrinol*, 3(2), 148-57. DOI: 10.1016/S2213-8587(14)70033-6 PMID: 24731670
194. Krystal, A. D. Depression and insomnia in women. *Clin Cornerstone* 6 Suppl 1B, S19-28 (2004).
195. Lyytikäinen, P., Rahkonen, O., Lahelma, E. & Lallukka, T. Association of sleep duration with weight and weight gain: a prospective follow-up study. *Journal of sleep research* 20, 298-302, doi:10.1111/j.1365-2869.2010.00903.x (2011).
196. Cusmano, D. M., Viechweg, S. & Mong, J. A. Blockade of estrogenic action in the MnPN disrupts sleep/wake behavior in the female rat. *Sleep* 36, A11 (2013).
197. Nagata, N, and Urade, Y (2012). [Sleep-wake regulation by prostaglandin D2 and adenosine]. *Brain Nerve* 64, 621–628.
198. Paxinos, G, and Watson, C (2007). *The rat brain in stereotaxic coordinates*, Amsterdam ; Boston: Academic Press/Elsevier.
199. Holder, M. K., Veichweg, S. S. & Mong, J. A. Methamphetamine-enhanced female sexual motivation is dependent on dopamine and progesterone signaling in the medial amygdala. *Horm Behav* 67, 1-11, doi:10.1016/j.yhbeh.2014.10.004 (2015).
200. Kleinlogel, H (1990). Analysis of the vigilance stages in the rat by fast Fourier transformation. *Neuropsychobiology* 23, 197–204.
201. Sitnikova, E, Hramov, AE, Koronovsky, AA, and van Luijckelaar, G (2009). Sleep spindles and spike-wave discharges in EEG: Their generic features, similarities and distinctions disclosed with Fourier transform and continuous wavelet analysis. *J Neurosci Methods* 180, 304–316.
202. O'Hara, BF, Young, KA, Watson, FL, Heller, HC, and Kilduff, TS (1993). Immediate early gene expression in brain during sleep deprivation: preliminary observations. *Sleep* 16, 1–7.

203. Ugalde, E, Corsi-Cabrera, M, Juárez, J, Ramos, J, and Arce, C (1994). Waking electroencephalogram activity as a consequence of sleep and total sleep deprivation in the rat. *Sleep* 17, 226–230.
204. Schwartz, M. D. & Mong, J. A. Estradiol suppresses recovery of REM sleep following sleep deprivation in ovariectomized female rats. *Physiology & Behavior* 104, 962-971, doi:10.1016/j.physbeh.2011.06.016 (2011).
205. Deurveilher S, Rusak B, Semba K. Estradiol and progesterone modulate spontaneous sleep patterns and recovery from sleep deprivation in ovariectomized rats. *Sleep* 2009;32:865-77.
206. Porkka-Heiskanen, T, Strecker, RE, and McCarley, RW (2000). Brain site-specificity of extracellular adenosine concentration changes during sleep deprivation and spontaneous sleep: an in vivo microdialysis study. *Neuroscience* 99, 507–517.
207. Christie, MA, Bolortuya, Y, Chen, LC, McKenna, JT, McCarley, RW, and Strecker, RE (2008). Microdialysis elevation of adenosine in the basal forebrain produces vigilance impairments in the rat psychomotor vigilance task. *Sleep* 31, 1393–1398.
208. Latini, S, and Pedata, F (2001). Adenosine in the central nervous system: release mechanisms and extracellular concentrations. *J Neurochem* 79, 463–484.
209. Scharbarg, E, Daenens, M, Lemaître, F, Geoffroy, H, Guille-Collignon, M, Gallopin, T, and Rancillac, A (2016). Astrocyte-derived adenosine is central to the hypnogenic effect of glucose. *Sci Rep* 6, 19107.
210. Hong, Z-Y, Huang, Z-L, Qu, W-M, Eguchi, N, Urade, Y, and Hayaishi, O (2005). An adenosine A receptor agonist induces sleep by increasing GABA release in the tuberomammillary nucleus to inhibit histaminergic systems in rats. *J Neurochem* 92, 1542–1549.
211. Yum, D-S, Cho, J-H, Choi, I-S, Nakamura, M, Lee, J-J, Lee, M-G, Choi, B-J, Choi, J-K, and Jang, I-S (2008). Adenosine A1 receptors inhibit GABAergic transmission in rat tuberomammillary nucleus neurons. *J Neurochem* 106, 361–371.
212. Wang, Y, Copeland, J, Shin, M, Chang, Y, and Venton, BJ (2020). CD73 or CD39 Deletion Reveals Different Mechanisms of Formation for Spontaneous and Mechanically Stimulated Adenosine and Sex Specific Compensations in ATP Degradation. *ACS Chem Neurosci* 11, 919–928.
213. Sherin JE, Shiromani PJ, McCarley RW, Saper CB. Activation of ventrolateral preoptic neurons during sleep. *Science* 1996;271:216-9.
214. Sherin JE, Elmquist JK, Torrealba F, Saper CB. Innervation of histaminergic tuberomammillary neurons by GABAergic and galaninergic neurons in the ventrolateral preoptic nucleus of the rat. *The Journal of neuroscience: the official journal of the Society for Neuroscience* 1998;18:4705-21.

215. Steininger TL, Gong H, McGinty D, Szymusiak R. Subregional organization of preoptic area/anterior hypothalamic projections to arousal-related monoaminergic cell groups. *The Journal of comparative neurology* 2001;429:638-53.
216. Haas H, Panula P. The role of histamine and the tuberomamillary nucleus in the nervous system. *Nature reviews. Neuroscience* 2003;4:121-30.
217. Haywood SA, Simonian SX, van der Beek EM, Bicknell RJ, Herbison AE. Fluctuating estrogen and progesterone receptor expression in brainstem norepinephrine neurons through the rat estrous cycle. *Endocrinology* 1999;140:3255-63.
218. Helena CV, de Oliveira Poletini M, Sanvitto GL, Hayashi S, Franci CR, Anselmo-Franci JA. Changes in alpha-estradiol receptor and progesterone receptor expression in the locus coeruleus and preoptic area throughout the rat estrous cycle. *The Journal of endocrinology* 2006;188:155-65.
219. Sheng Z, Kawano J, Yanai A, et al. Expression of estrogen receptors (alpha, beta) and androgen receptor in serotonin neurons of the rat and mouse dorsal raphe nuclei; sex and species differences. *Neuroscience research* 2004;49:185-96.
220. Shughrue PJ, Lane MV, Merchenthaler I. Comparative distribution of estrogen receptor-alpha and -beta mRNA in the rat central nervous system. *The Journal of comparative neurology* 1997;388:507-25.
221. Simerly RB, Chang C, Muramatsu M, Swanson LW. Distribution of androgen and estrogen receptor mRNA-containing cells in the rat brain: an in situ hybridization study. *The Journal of comparative neurology* 1990;294:76-95.
222. Brown RE, Basheer R, McKenna JT, Strecker RE, McCarley RW. Control of sleep and wakefulness. *Physiological reviews* 2012;92:1087-187.
223. Steriade M, Dossi R, Pare D, Oakson G. Fast oscillations (20-40 Hz) in thalamocortical systems and their potentiation by mesopontine cholinergic nuclei in the cat. *Proceedings of the National Academy of Sciences of the United States of America* 1991;88:4396-400.
224. Lu J, Sherman D, Devor M, Saper CB. A putative flip-flop switch for control of REM sleep. *Nature* 2006;441:589-94.
225. Luppi PH, Clement O, Fort P. Paradoxical (REM) sleep genesis by the brainstem is under hypothalamic control. *current opinion in neurobiology* 2013;23:786-92.
226. Santollo J, Eckel LA. Oestradiol decreases melanin-concentrating hormone (MCH) and MCH receptor expression in the hypothalamus of female rats. *J Neuroendocrinol* 2013;25:570-9.

227. Halassa, MM, Florian, C, Fellin, T, Munoz, JR, Lee, S-Y, Abel, T, Haydon, PG, and Frank, MG (2009). Astrocytic modulation of sleep homeostasis and cognitive consequences of sleep loss. *Neuron* 61, 213–219.
228. Losi, G., Mariotti, L., Sessolo, M. & Carmignoto, G. New Tools to Study Astrocyte Ca(2+) Signal Dynamics in Brain Networks In Vivo. *Frontiers in cellular neuroscience* 11, 134, doi:10.3389/fncel.2017.00134 (2017).
229. Pelluru, D., Konadhode, R. R., Bhat, N. R. & Shiromani, P. J. Optogenetic stimulation of astrocytes in the posterior hypothalamus increases sleep at night in C57BL/6J mice. *Eur J Neurosci* 43, 1298-1306, doi:10.1111/ejn.13074 (2016).
